# Supplementary material for: Phenylstyrylpyrimidine derivatives as potential multipotent therapeutics for Alzheimer's disease
Source: Royal Society of Chemistry journal article supplement (doi:10.1039/d4md00277f), 2024-01-01
Supplement: d4md00277f1.pdf [file d4md00277f1.pdf]

## Phenylstyrylpyrimidine Derivatives as Potential Multipotent Therapeutics for Alzheimer's Disease

Bharti Devi,<sup>a</sup> Kailash Jangid,<sup>a,b</sup> Vijay Kumar,<sup>a</sup> Tania Arora<sup>c</sup>, Naveen Kumar,<sup>a</sup> Ashish Ranjan Dwivedi,<sup>b,d</sup> Jyoti Parkash,<sup>c</sup> Vinod Kumar<sup>a\*</sup>

<sup>a</sup>Laboratory of Organic and Medicinal Chemistry, Department of Chemistry, Central University of Punjab, Bathinda-151401

<sup>b</sup>Department of Pharmaceutical Sciences and Natural Products, Central University of Punjab, Bathinda-151401

<sup>c</sup>Department of Zoology, School of Basic Sciences, Central University of Punjab, Bathinda-151401

<sup>d</sup>Gitam School of Pharmacy, Hyderabad, Telangana, 502329, India.

### *Corresponding author information*

Prof. Vinod Kumar  
Department of Chemistry,  
School of Basic Sciences,  
Central University of Punjab, Bathinda, Punjab-151401  
\*Email: [vpathania18@gmail.com](mailto:vpathania18@gmail.com), [vinod.kumar@cup.edu.in](mailto:vinod.kumar@cup.edu.in)

## Supplementary Material

### $^1\text{H}$ , $^{13}\text{C}$ NMR, & MS Spectra of Representative Compounds

#### Content:

#### Spectrum of representative compounds

**Figure 1.** Spectrum of compound **BV-1**

**Figure 2.** Spectrum of compound **BV-2**

**Figure 3.** Spectrum of compound **BV-3**

**Figure 4.** Spectrum of compound **BV-4**

**Figure 5.** Spectrum of compound **BV-5**

**Figure 6.** Spectrum of compound **BV-6**

**Figure 7.** Spectrum of compound **BV-7**

**Figure 8.** Spectrum of compound **BV-8**

**Figure 9.** Spectrum of compound **BV-9**

**Figure 10.** Spectrum of compound **BV-10**

**Figure 11.** Spectrum of compound **BV-11**

**Figure 12.** Spectrum of compound **BV-12**

**Figure 13.** Spectrum of compound **BV-13**

**Figure 14.** Spectrum of compound **BV-14**

**Figure 15.** Spectrum of compound **BV-15**

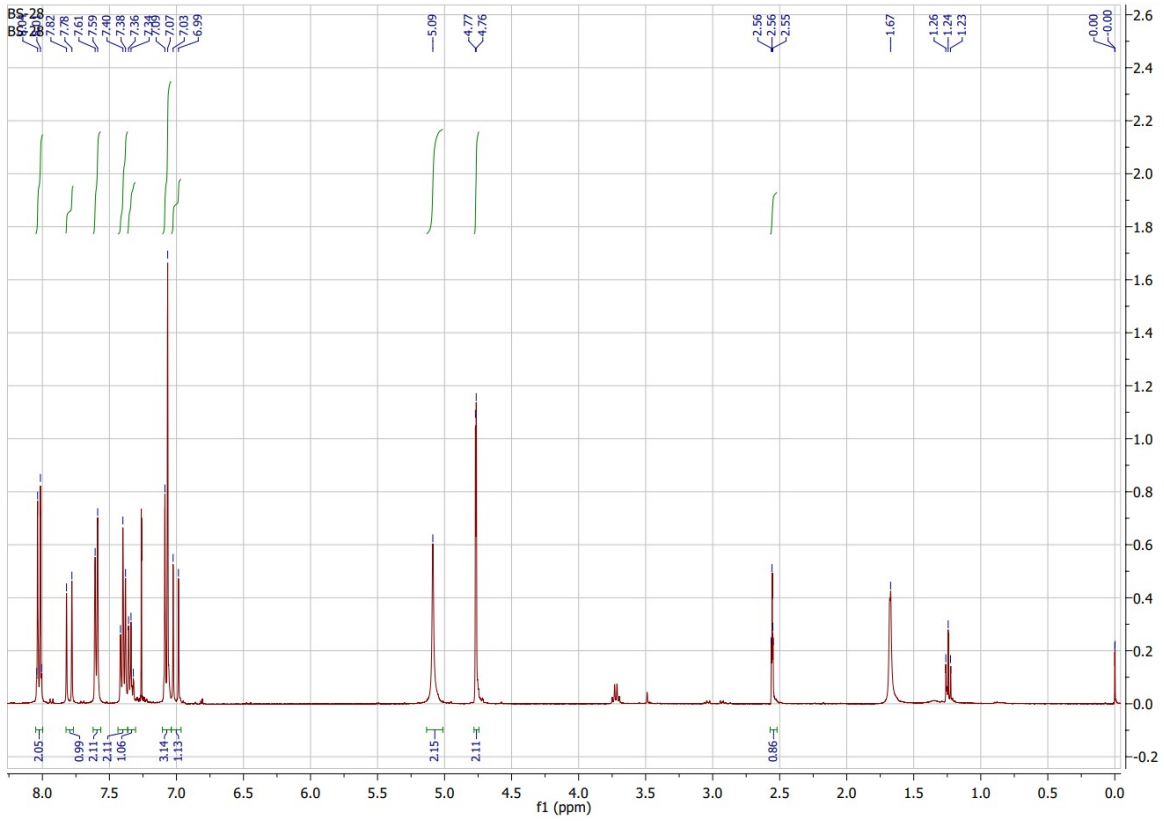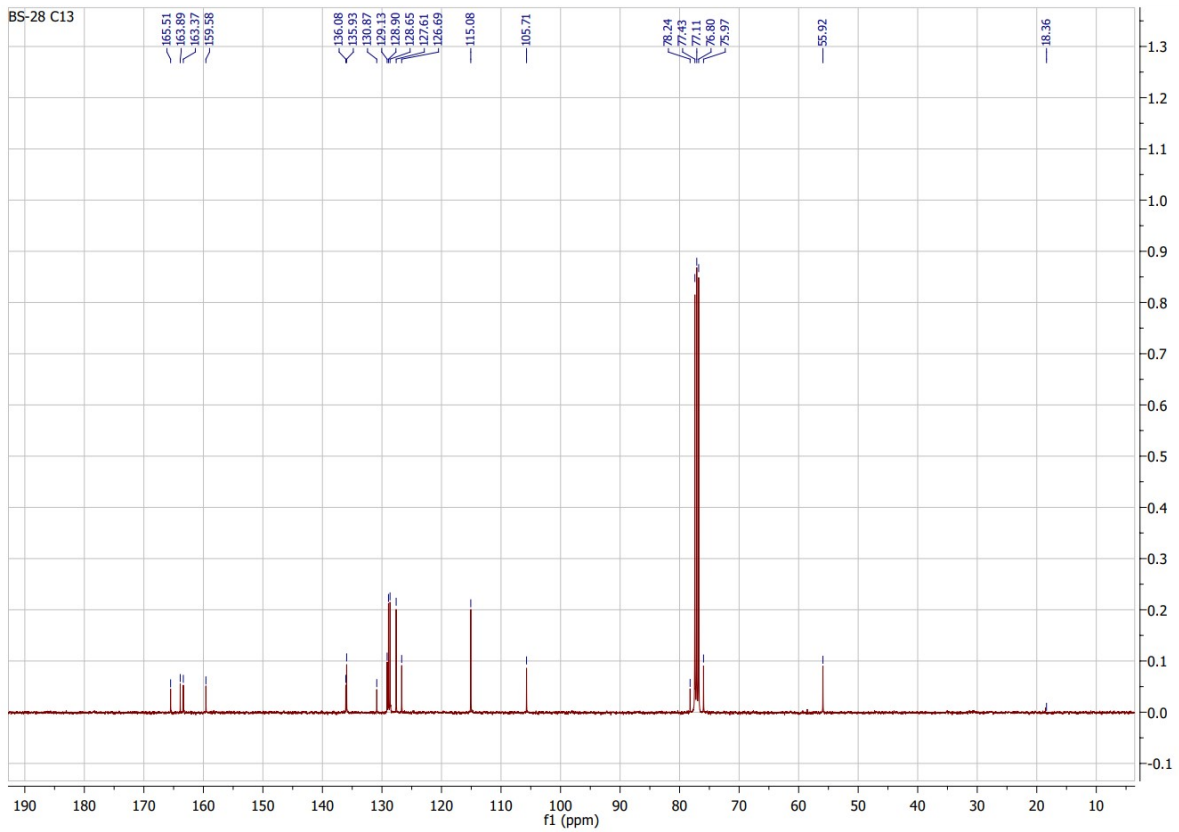

| Formula & Ion Species                                                            | m/z             | m/z (Calc)      | Abund            | Diff (ppm)  | Max Abund        | Species                  |
|----------------------------------------------------------------------------------|-----------------|-----------------|------------------|-------------|------------------|--------------------------|
| <b>[(C<sub>21</sub> H<sub>17</sub> N<sub>3</sub> O)<sub>2</sub>]<sup>+</sup></b> | <b>328.1449</b> | <b>328.1444</b> | <b>259306.55</b> | <b>1.47</b> | <b>259306.55</b> | <b>(M+H)<sup>+</sup></b> |

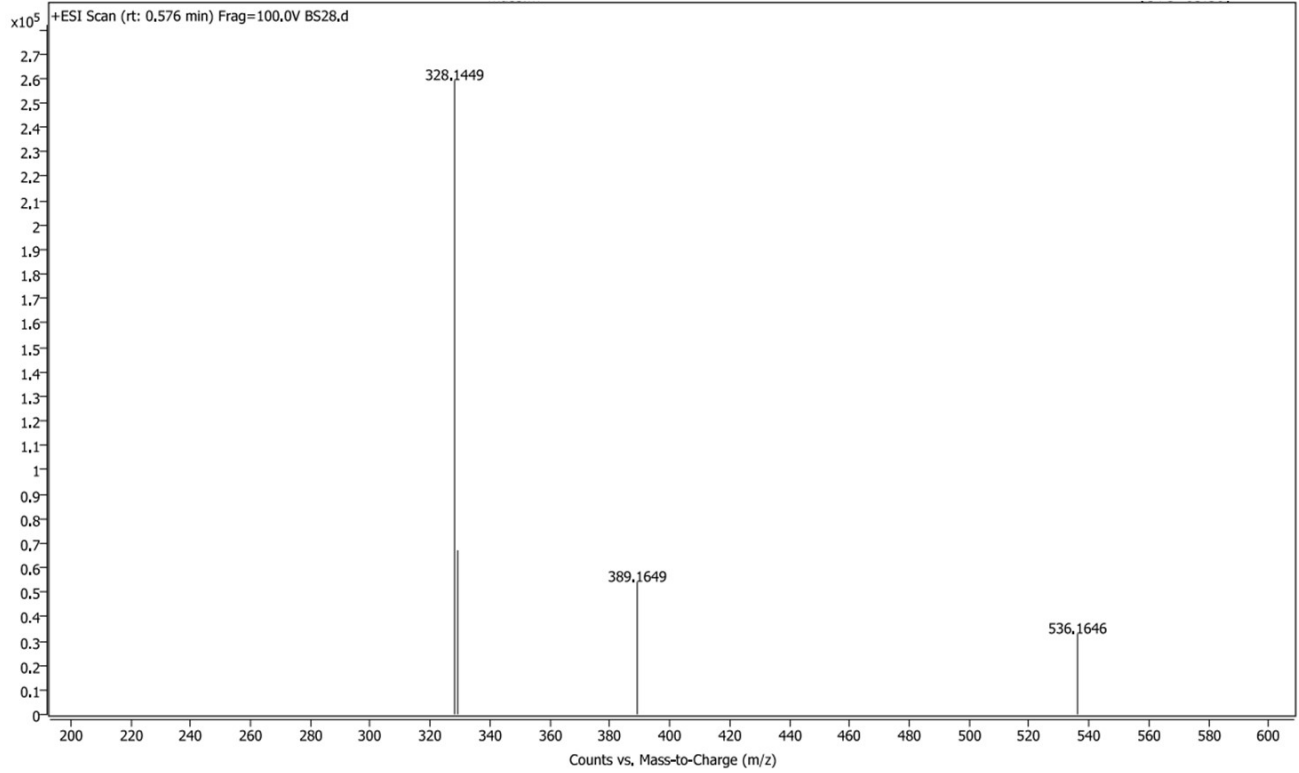

**Figure 1. Spectrum of compound BV-1**

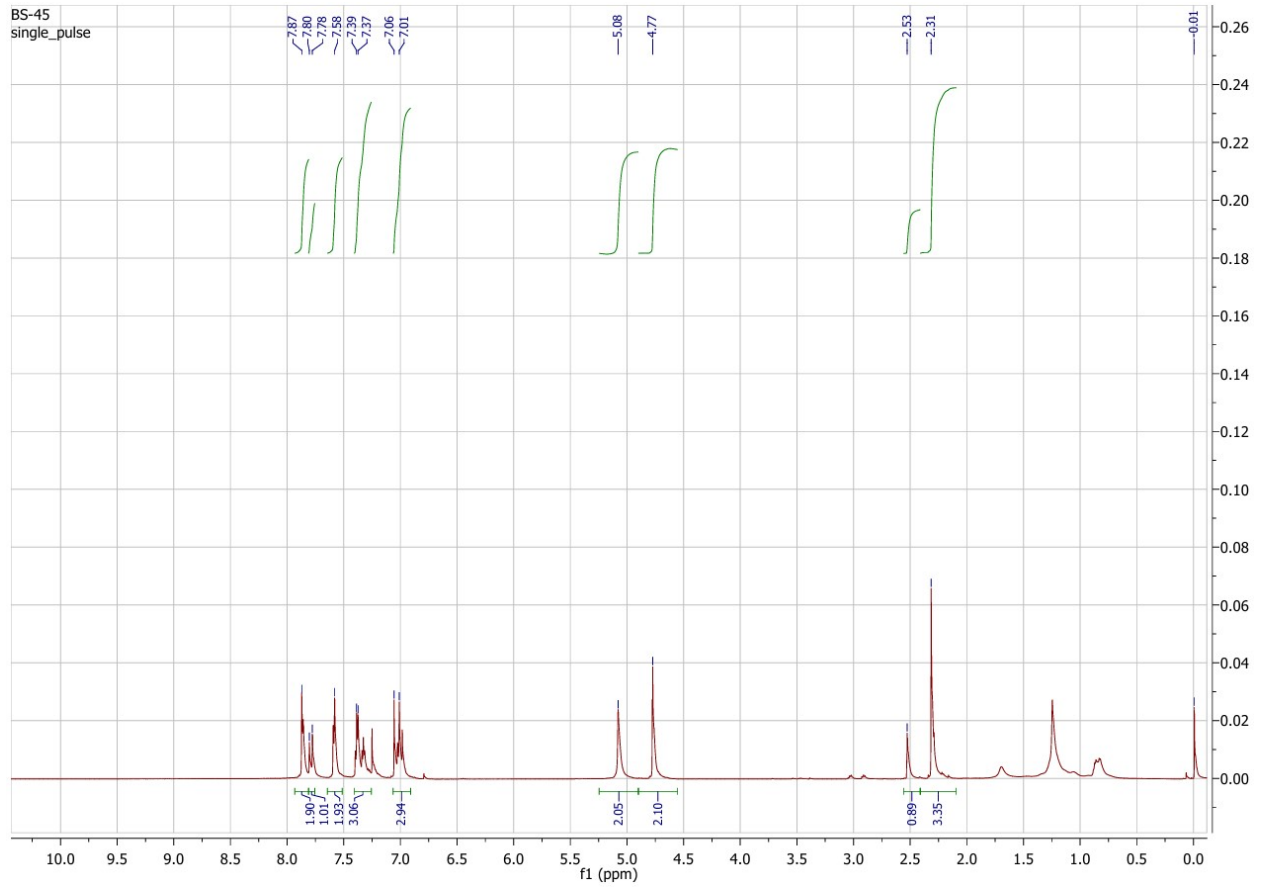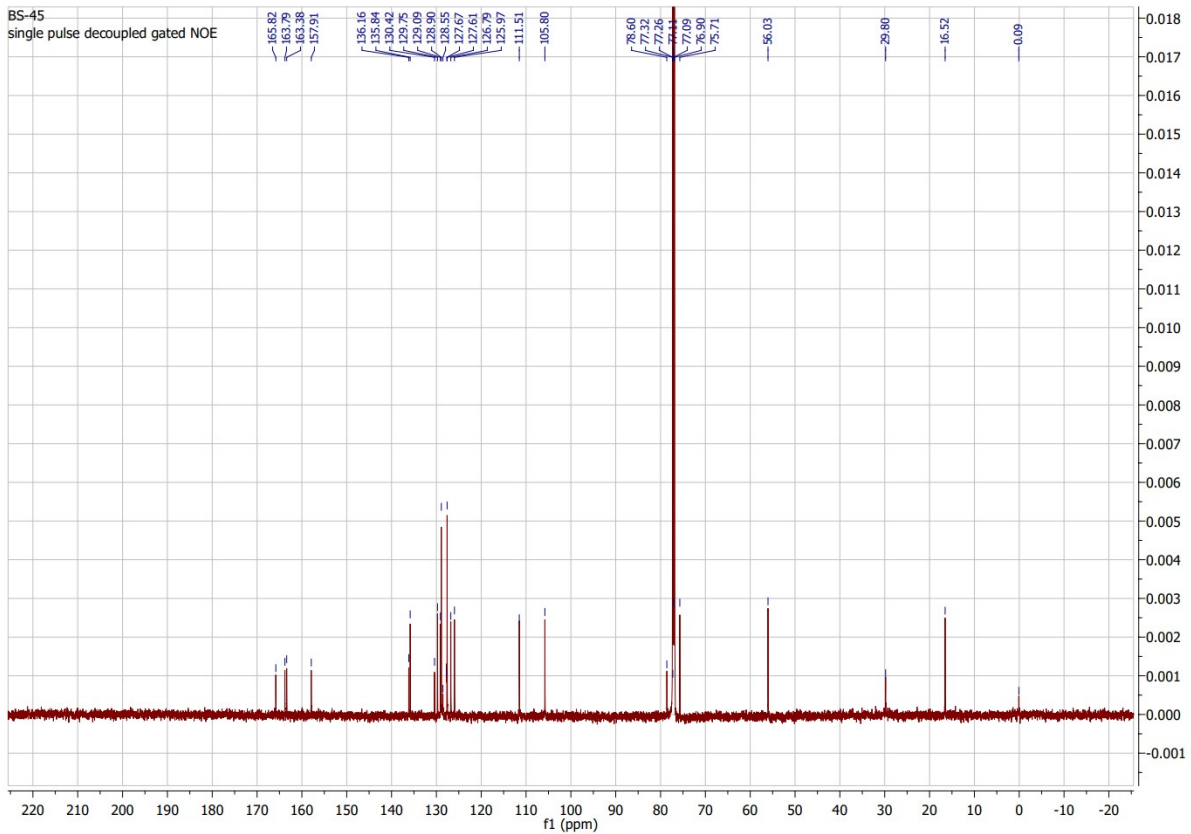

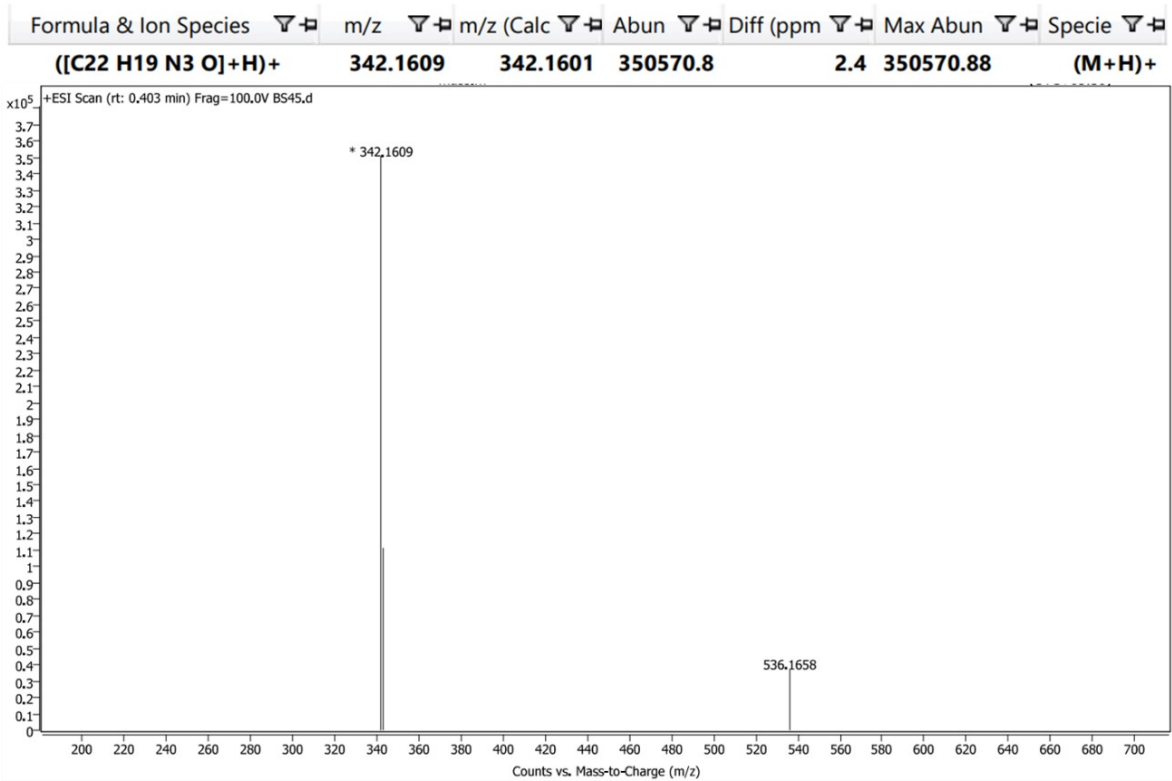

**Figure 2. Spectrum of compound BV-2**

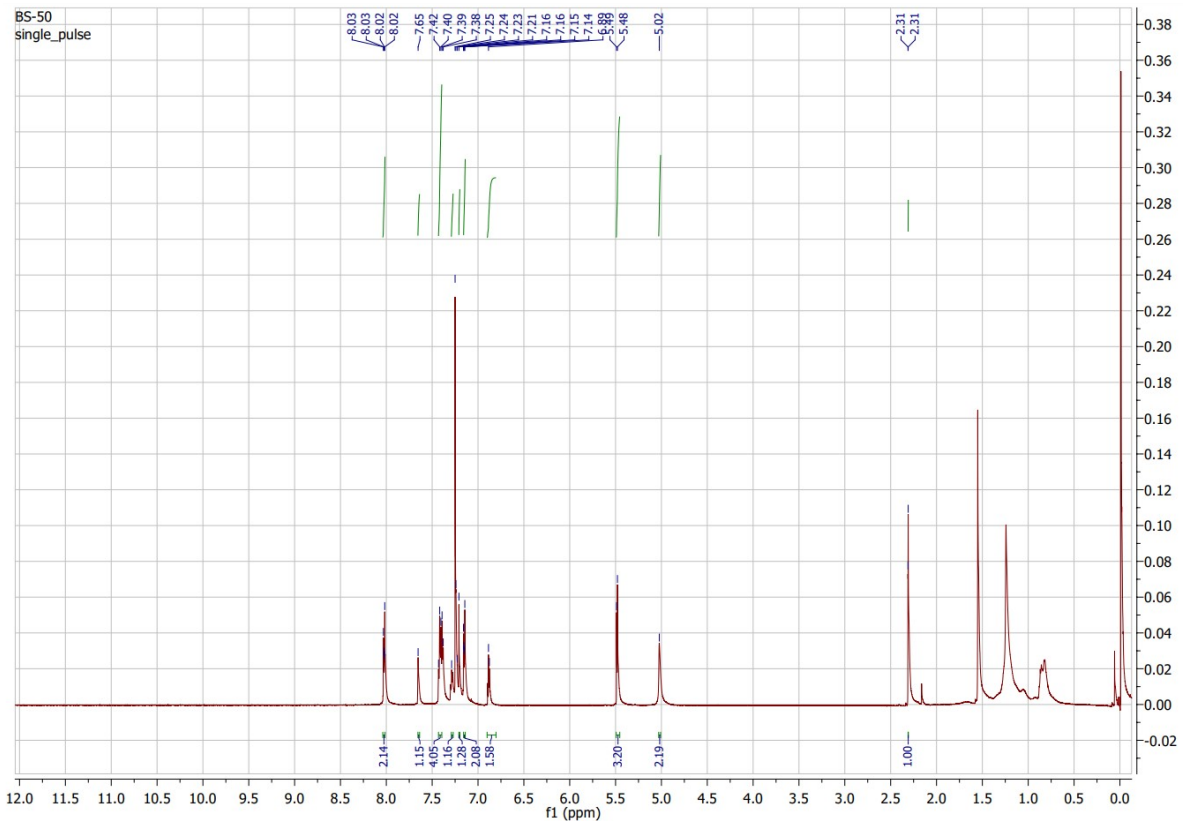

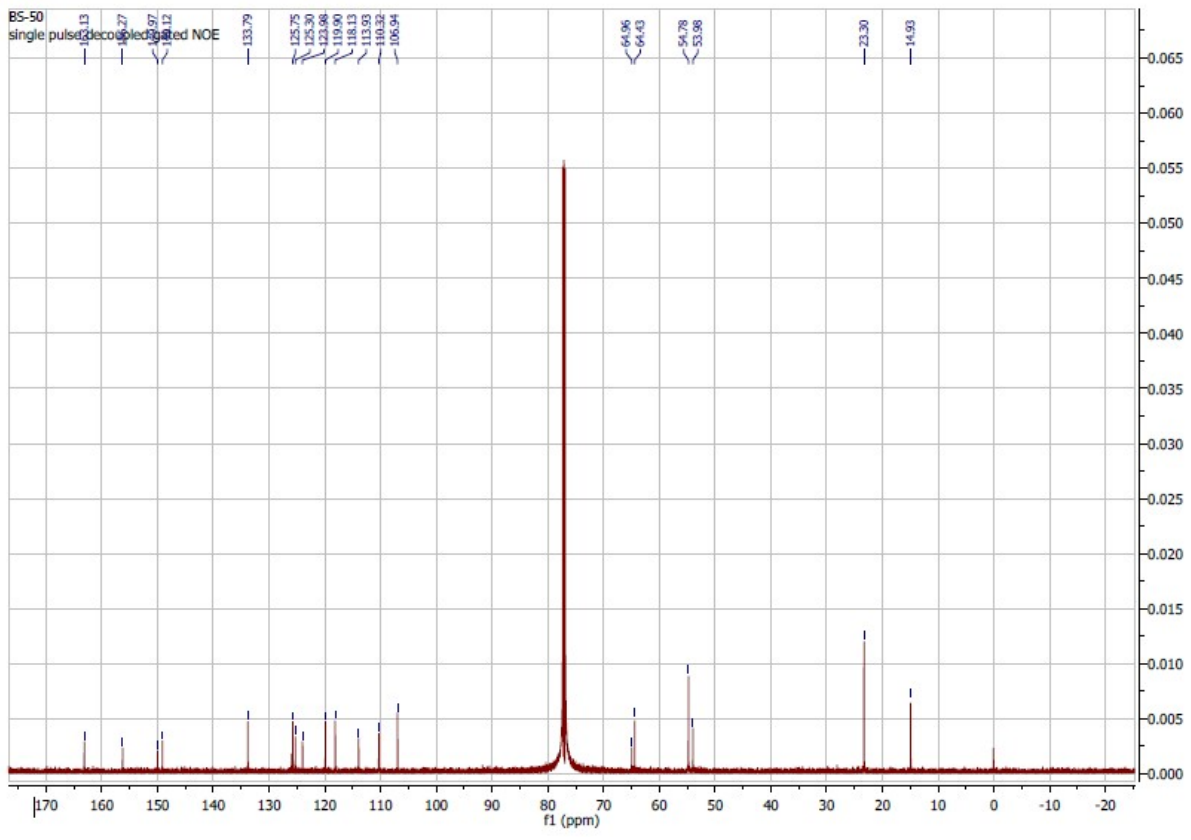

| Formula & Ion Species      | m/z             | m/z (Calc)      | Abund           | Diff (ppm)  | Max Abund       | Species       |
|----------------------------|-----------------|-----------------|-----------------|-------------|-----------------|---------------|
| <b>[(C22 H19 N3 O)+H]+</b> | <b>342.1609</b> | <b>342.1601</b> | <b>36865.33</b> | <b>2.32</b> | <b>36865.33</b> | <b>(M+H)+</b> |

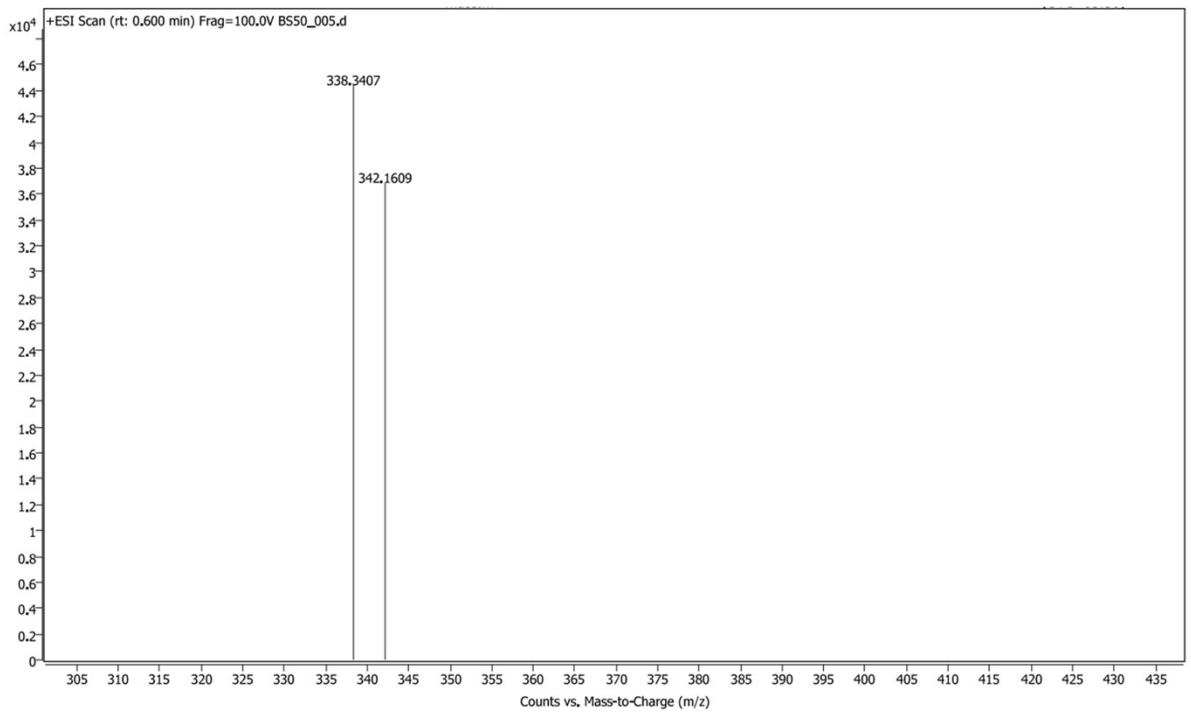

**Figure 3. Spectrum of compound BV-3**

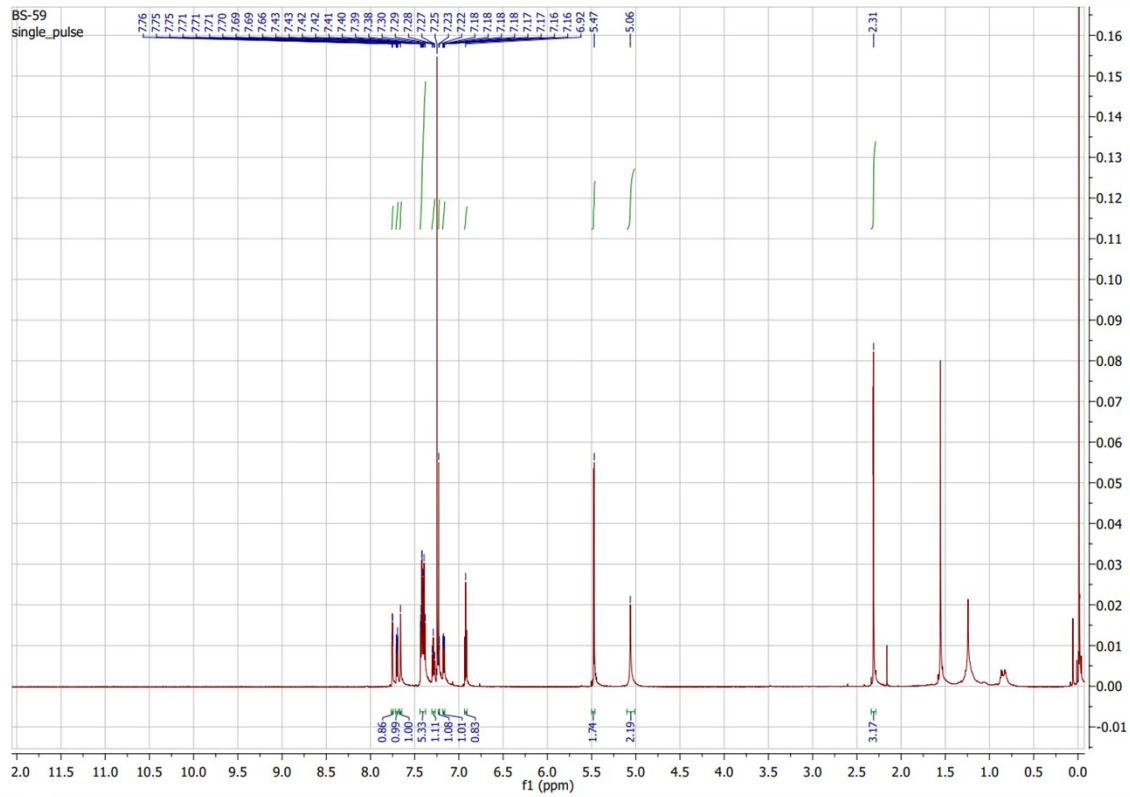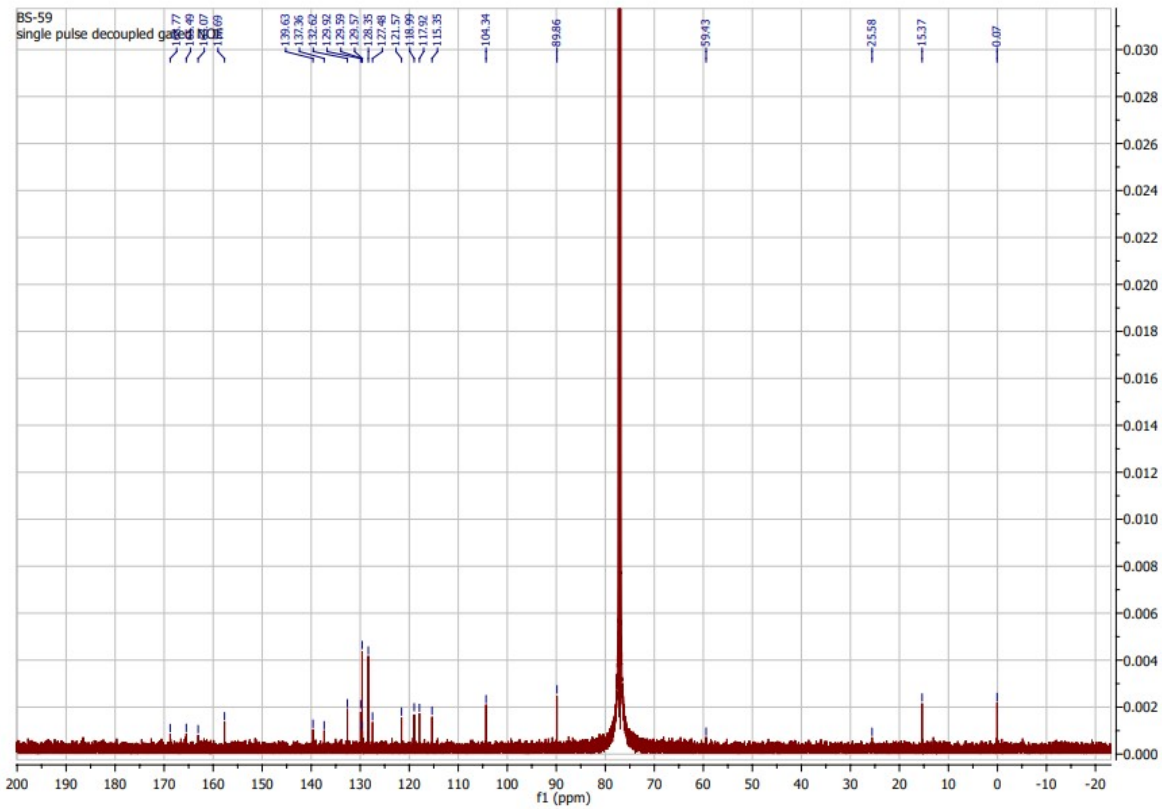



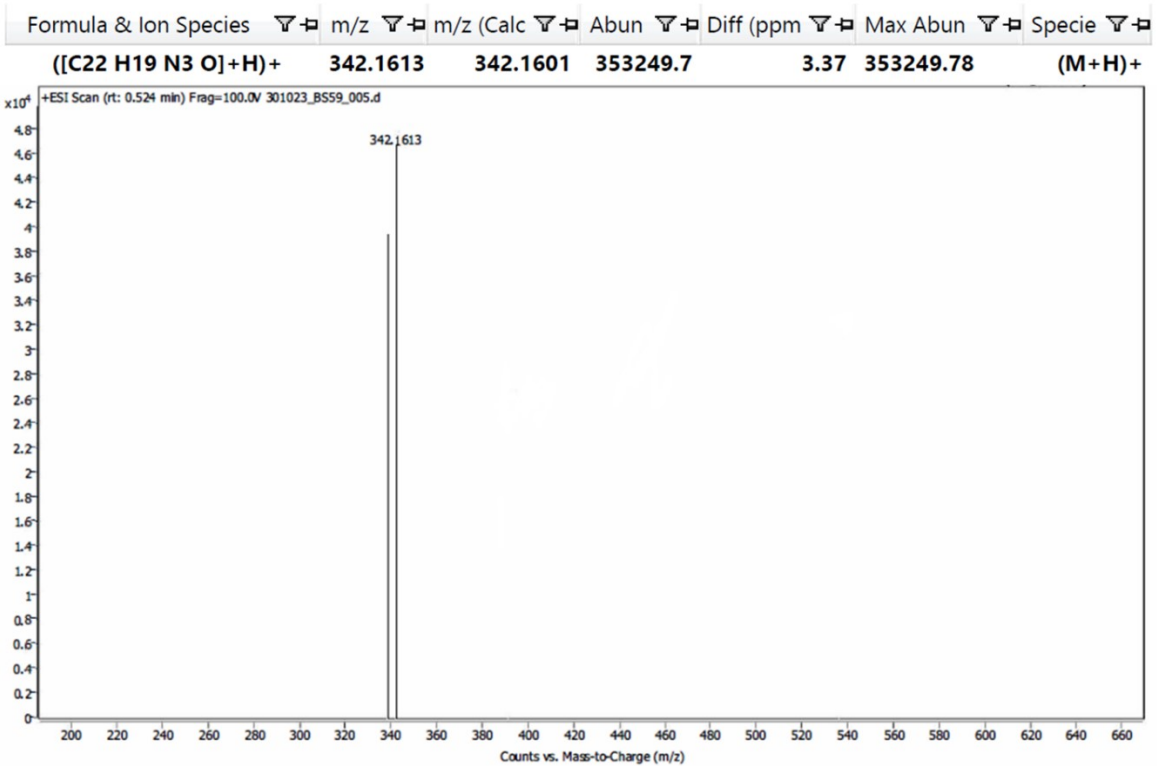

Figure 4. Spectrum of compound BV-4

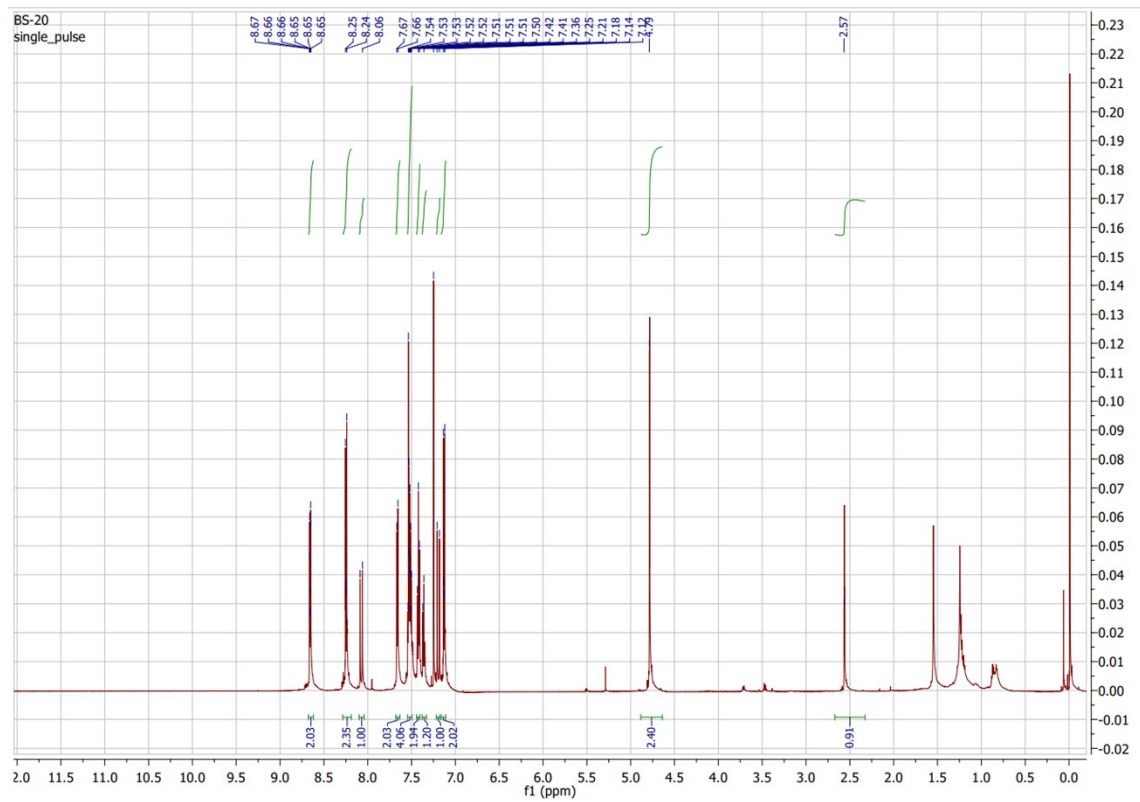

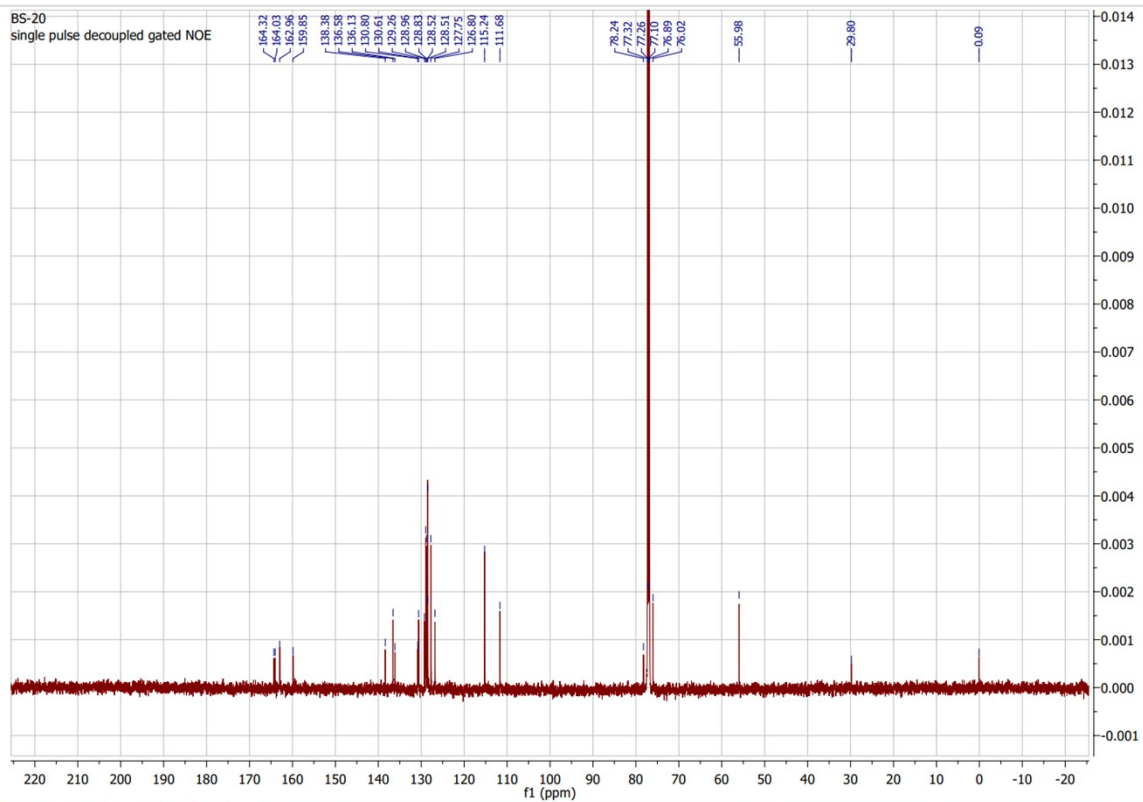

| Formula & Ion Species                                                             | m/z             | m/z (Calc)      | Abund            | Diff (ppm)  | Max Abun         | Specie                   |
|-----------------------------------------------------------------------------------|-----------------|-----------------|------------------|-------------|------------------|--------------------------|
| <b>[(C<sub>27</sub> H<sub>20</sub> N<sub>2</sub> O)]<sup>+</sup>H<sup>+</sup></b> | <b>389.1676</b> | <b>389.1648</b> | <b>946999.81</b> | <b>6.75</b> | <b>946999.81</b> | <b>(M+H)<sup>+</sup></b> |

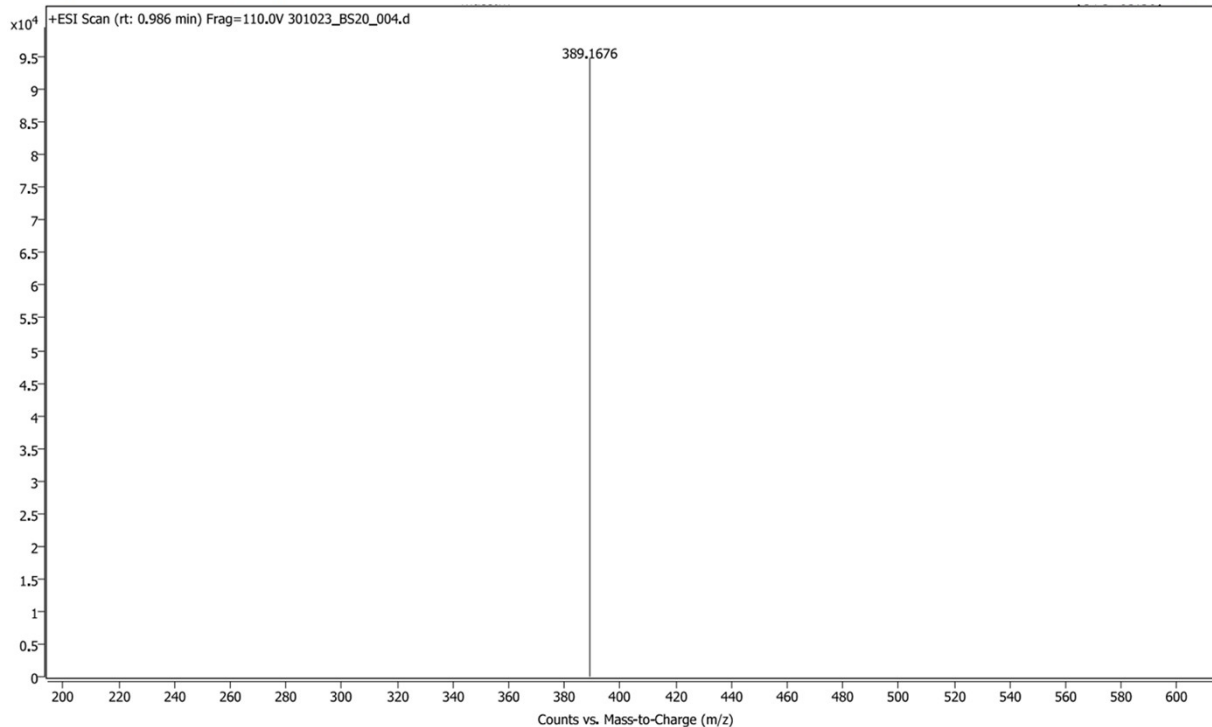

Figure 5. Spectrum of compound BV-5

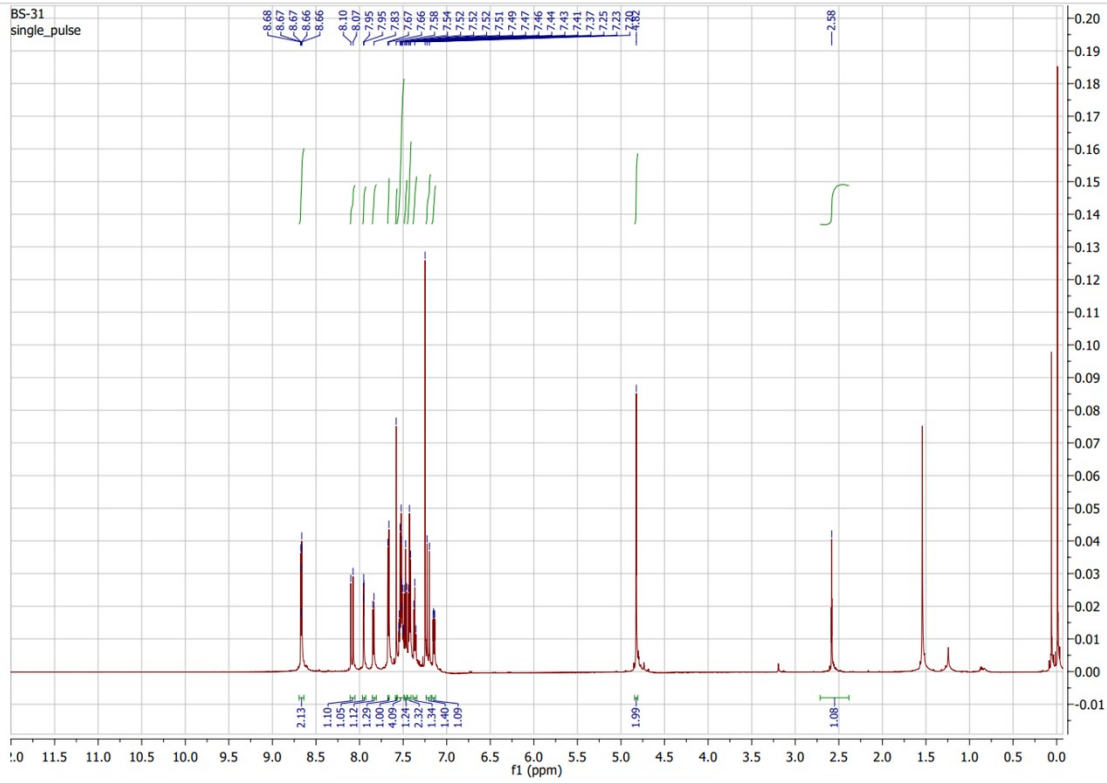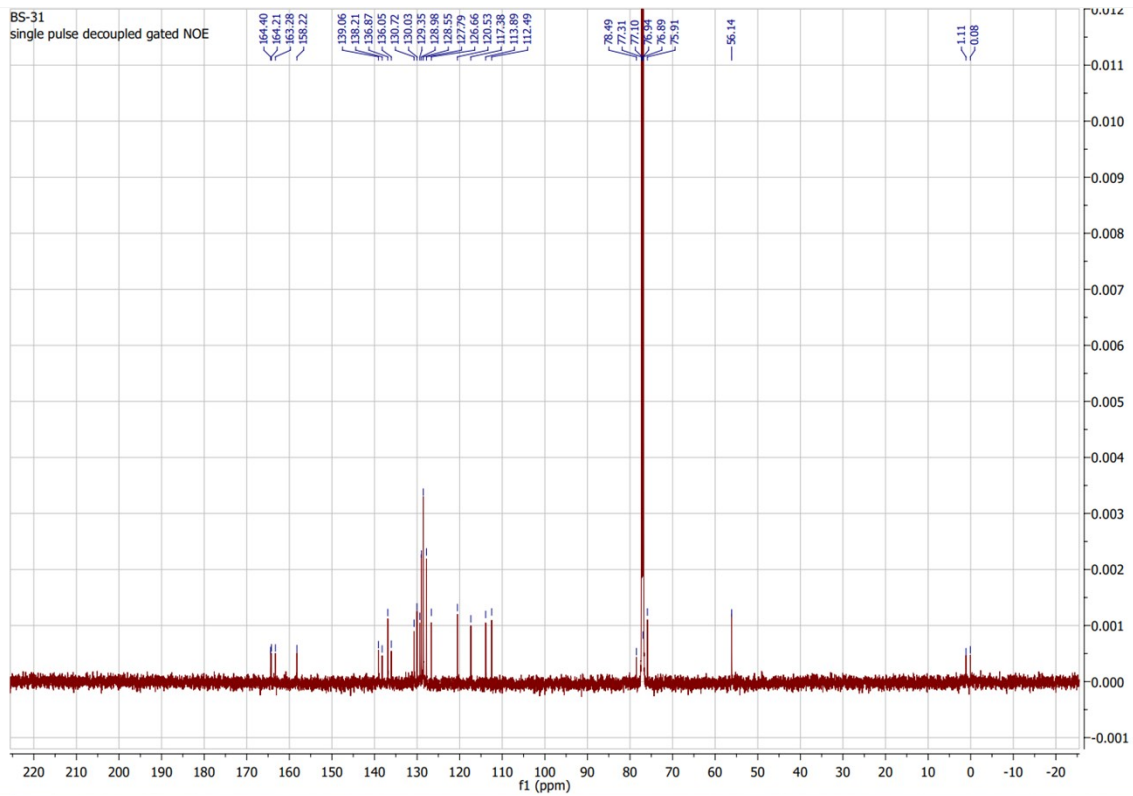

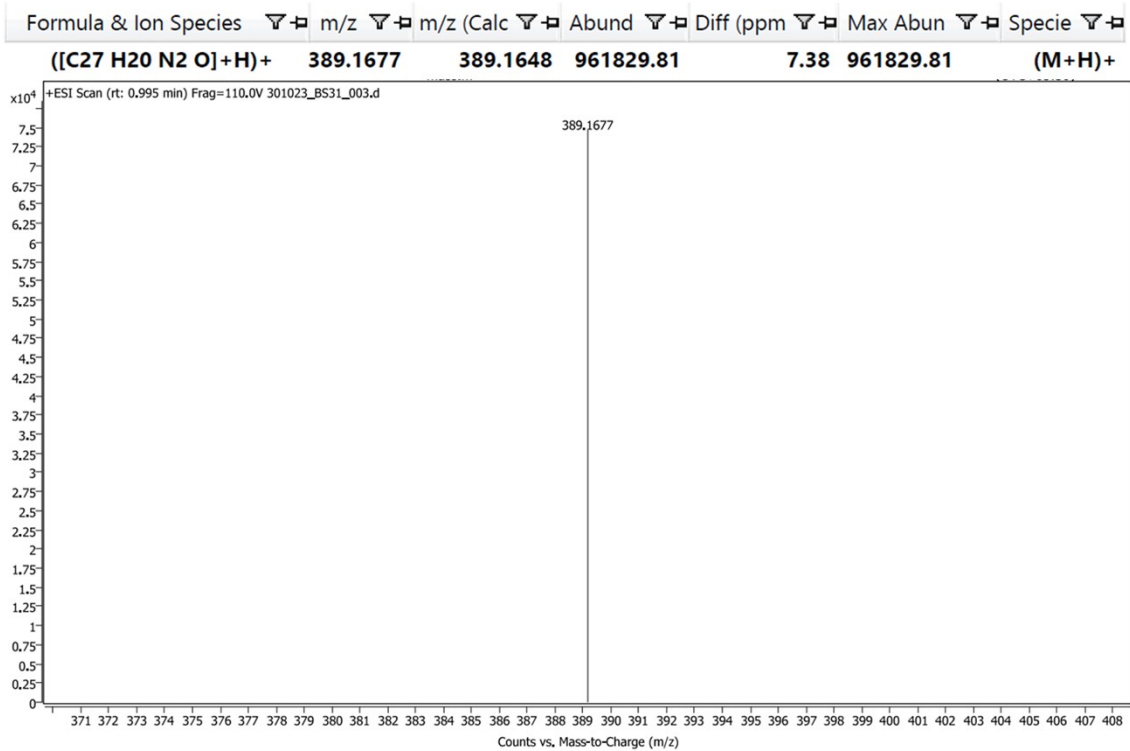

**Figure 6. Spectrum of compound BV-6**

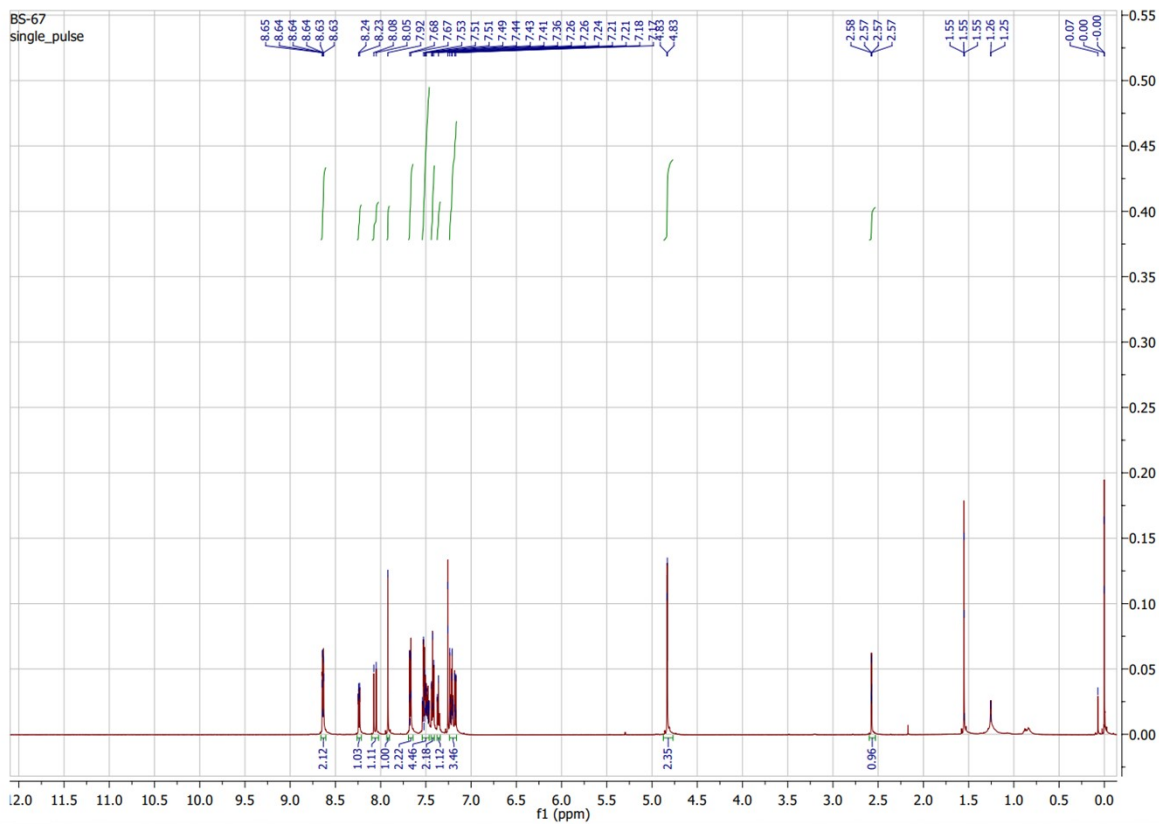

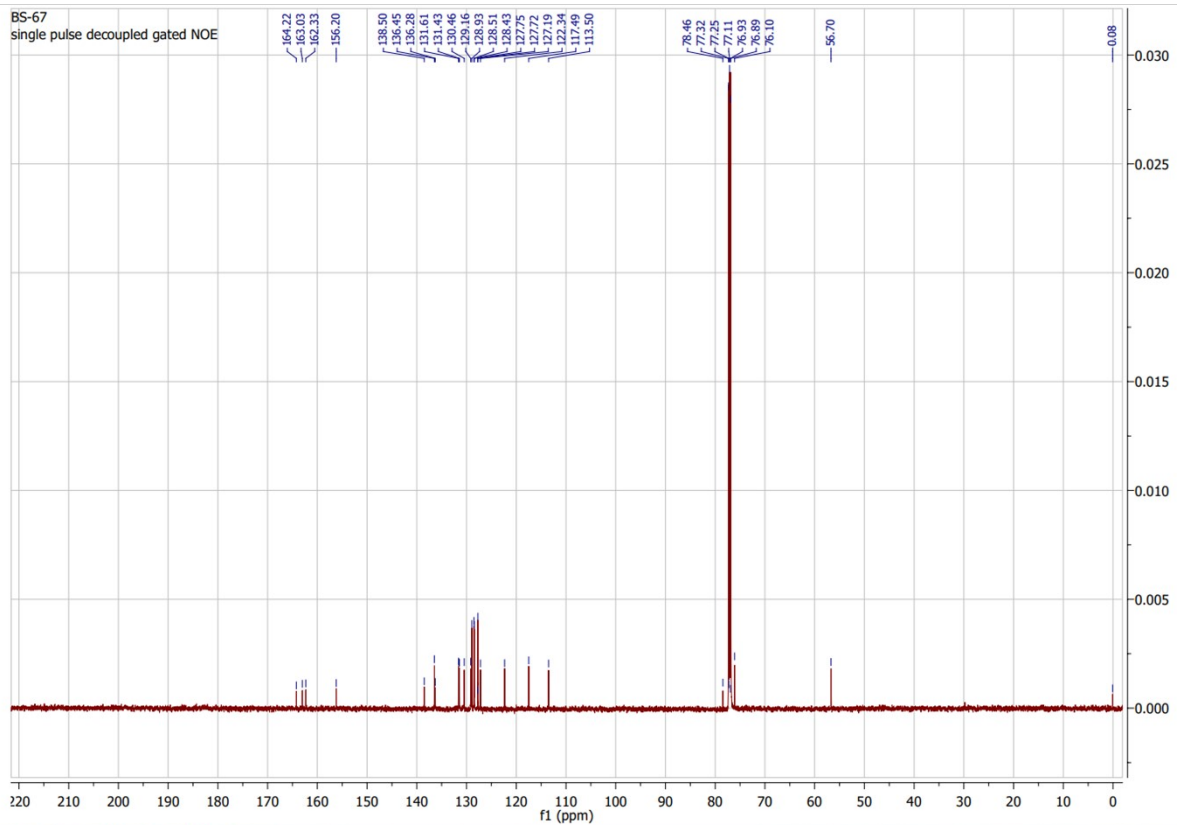

| Formula & Ion Species                                                  | m/z             | m/z (Calc)      | Abun            | Diff (ppm)  | Max Abun         | Specie                   |
|------------------------------------------------------------------------|-----------------|-----------------|-----------------|-------------|------------------|--------------------------|
| <b>[(C<sub>27</sub> H<sub>20</sub> N<sub>2</sub> O)+H]<sup>+</sup></b> | <b>389.1654</b> | <b>389.1648</b> | <b>232790.2</b> | <b>1.54</b> | <b>232790.28</b> | <b>(M+H)<sup>+</sup></b> |

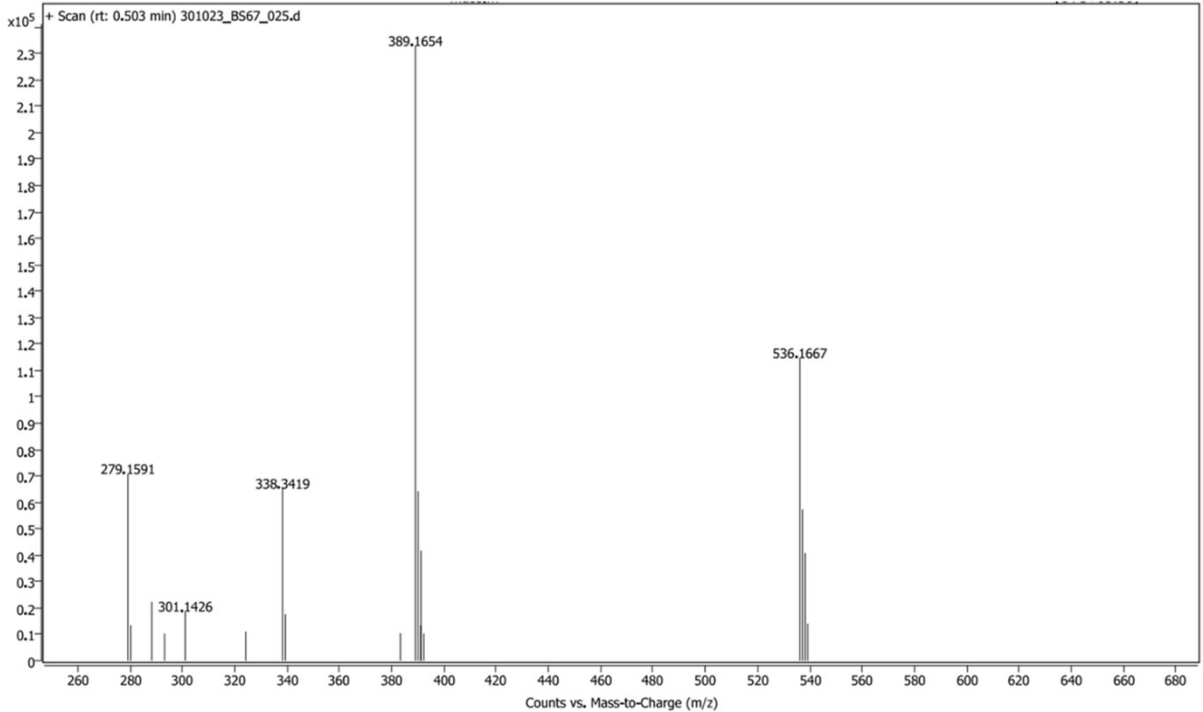

Figure 7. Spectrum of compound BV-7

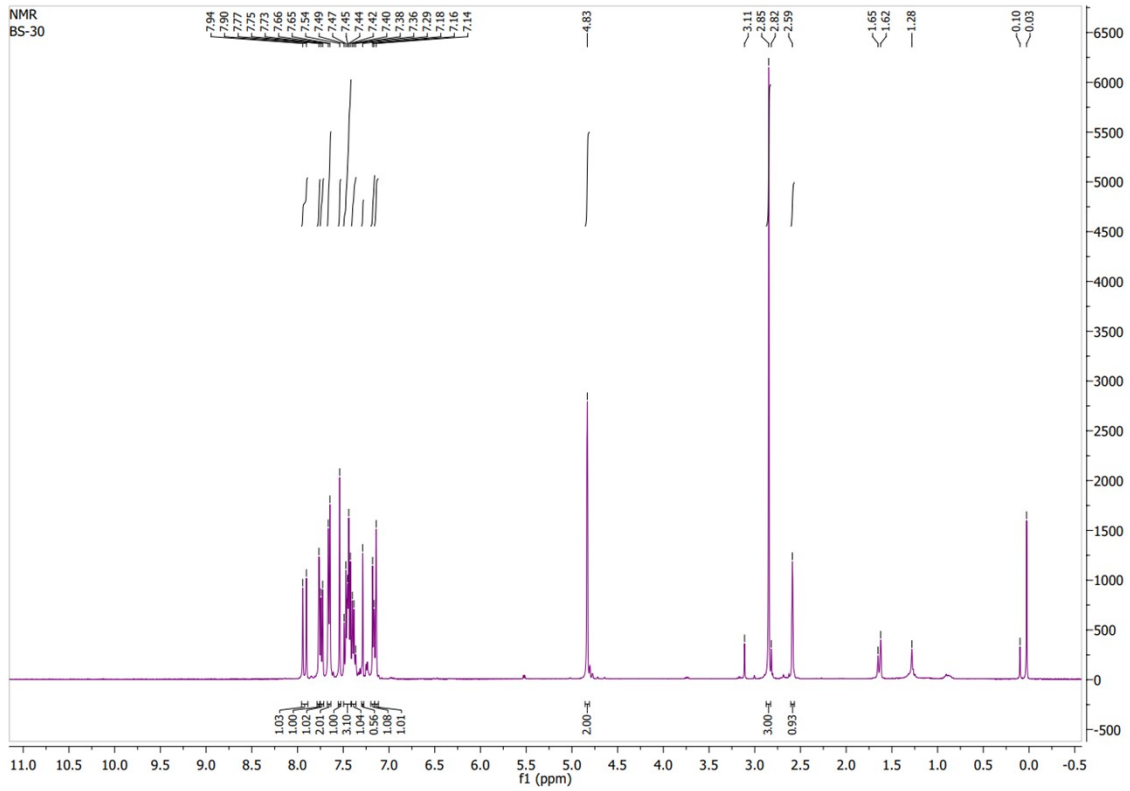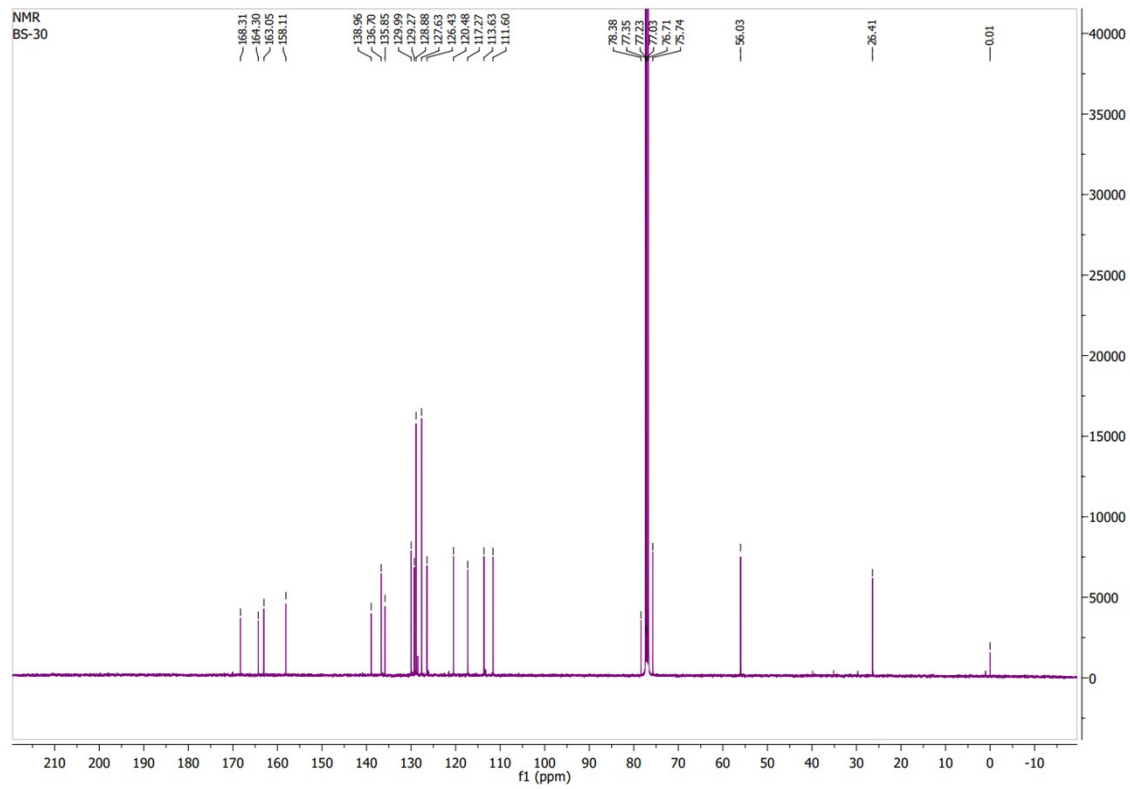

Formula & Ion Species  $\nabla$   $\square$  m/z  $\nabla$   $\square$  m/z (Calc  $\nabla$   $\square$  Abun  $\nabla$   $\square$  Diff (ppm  $\nabla$   $\square$  Max Abun  $\nabla$   $\square$  Spec  $\nabla$   $\square$

**[(C22 H18 N2 O)+H]+**    **327.1493**    **327.1492**    **244760.17**    **0.28**    **244760.17**    **(M+H)+**

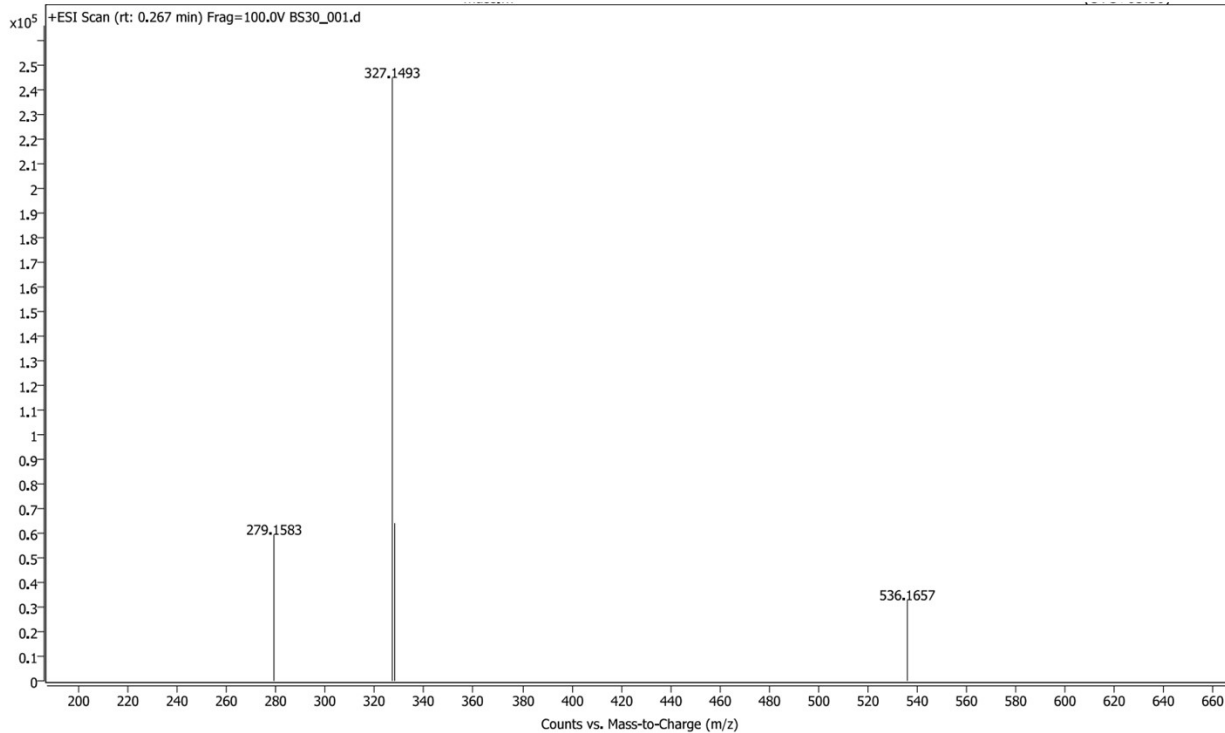

**Figure 8. Spectrum of compound BV-8**

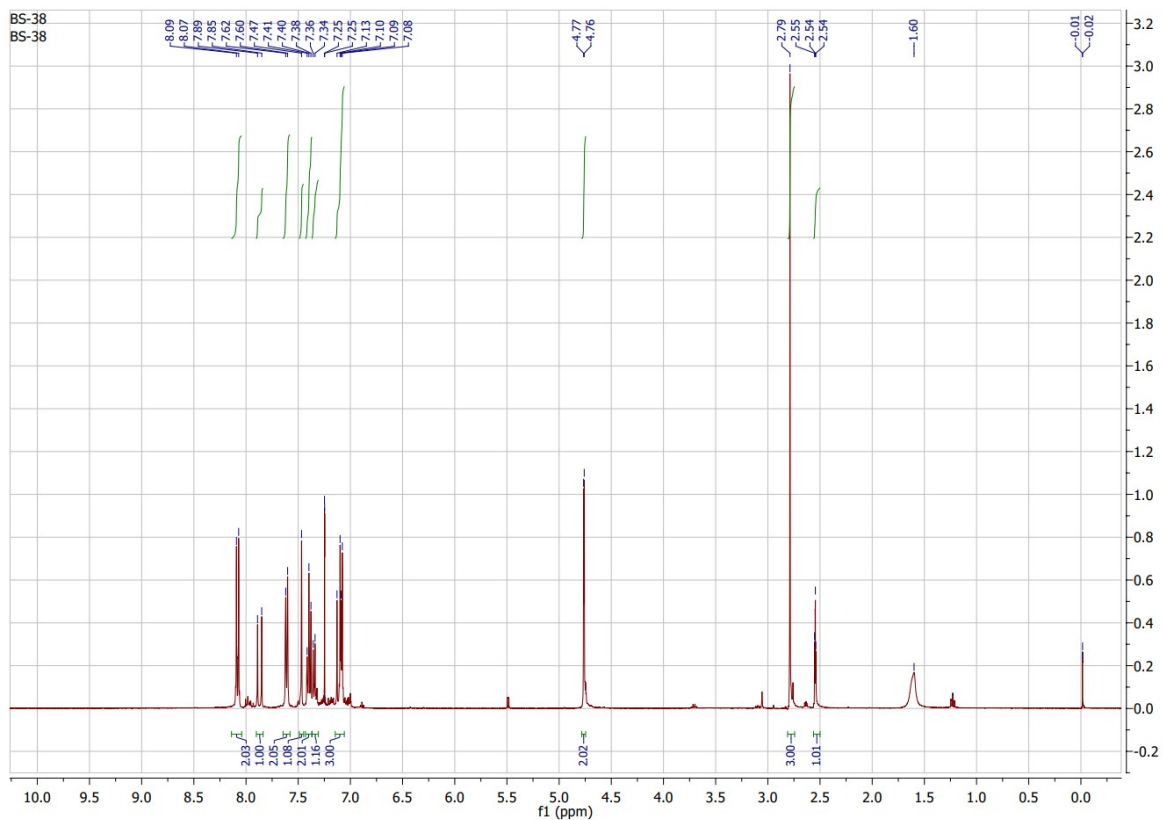

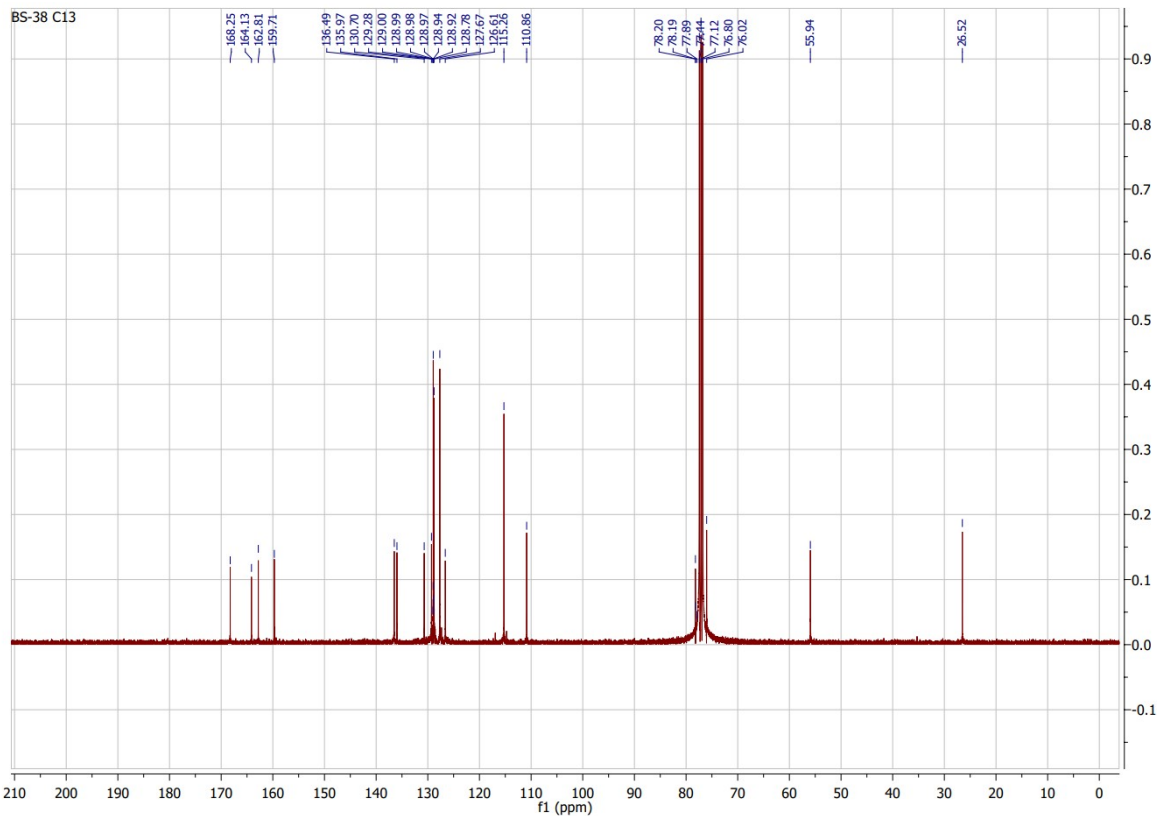

| Formula & Ion Species                 | m/z             | m/z (Calc)      | Abun            | Diff (ppm) | Max Abun         | Specie                   |
|---------------------------------------|-----------------|-----------------|-----------------|------------|------------------|--------------------------|
| <b>[(C22 H18 N2 O)+H]<sup>+</sup></b> | <b>327.1492</b> | <b>327.1492</b> | <b>176758.9</b> | <b>0.1</b> | <b>176758.92</b> | <b>(M+H)<sup>+</sup></b> |

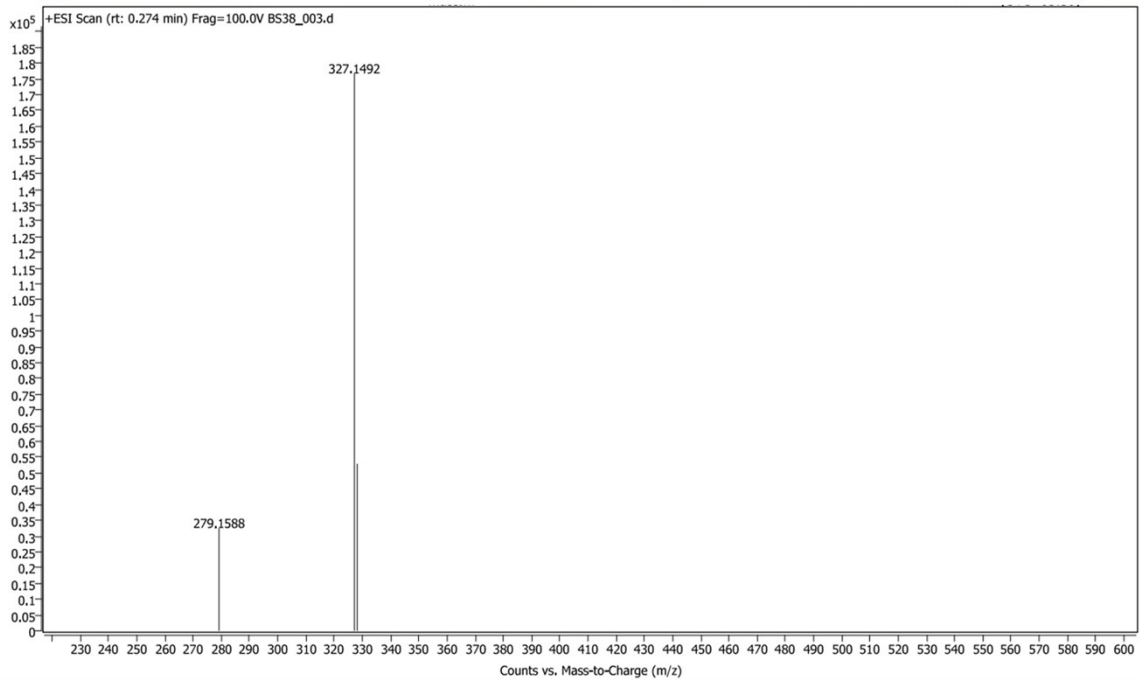

Figure 9. Spectrum of compound BV-9



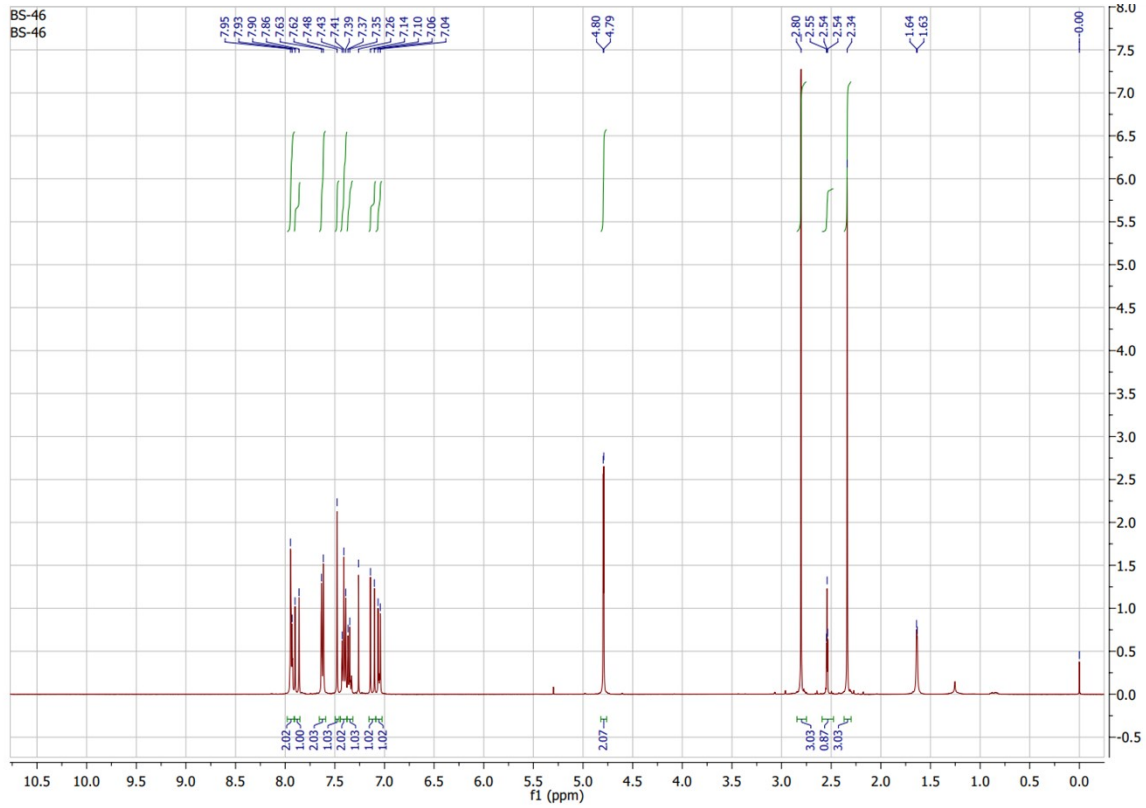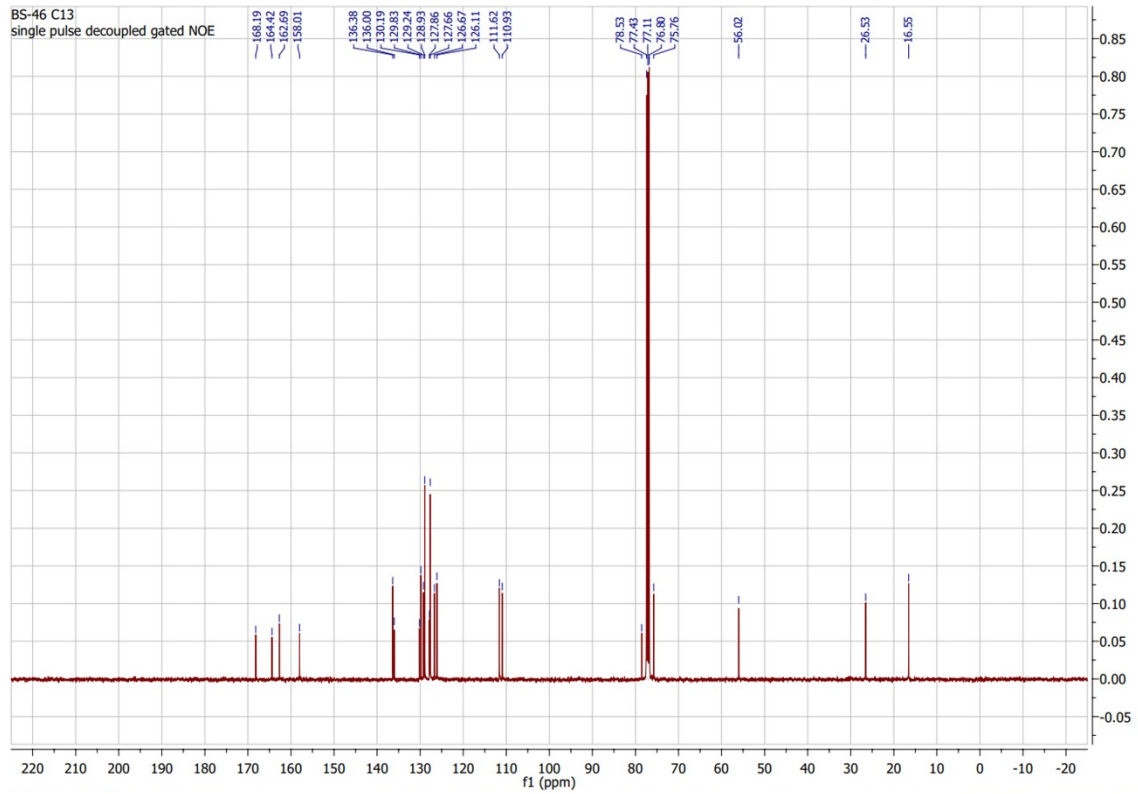

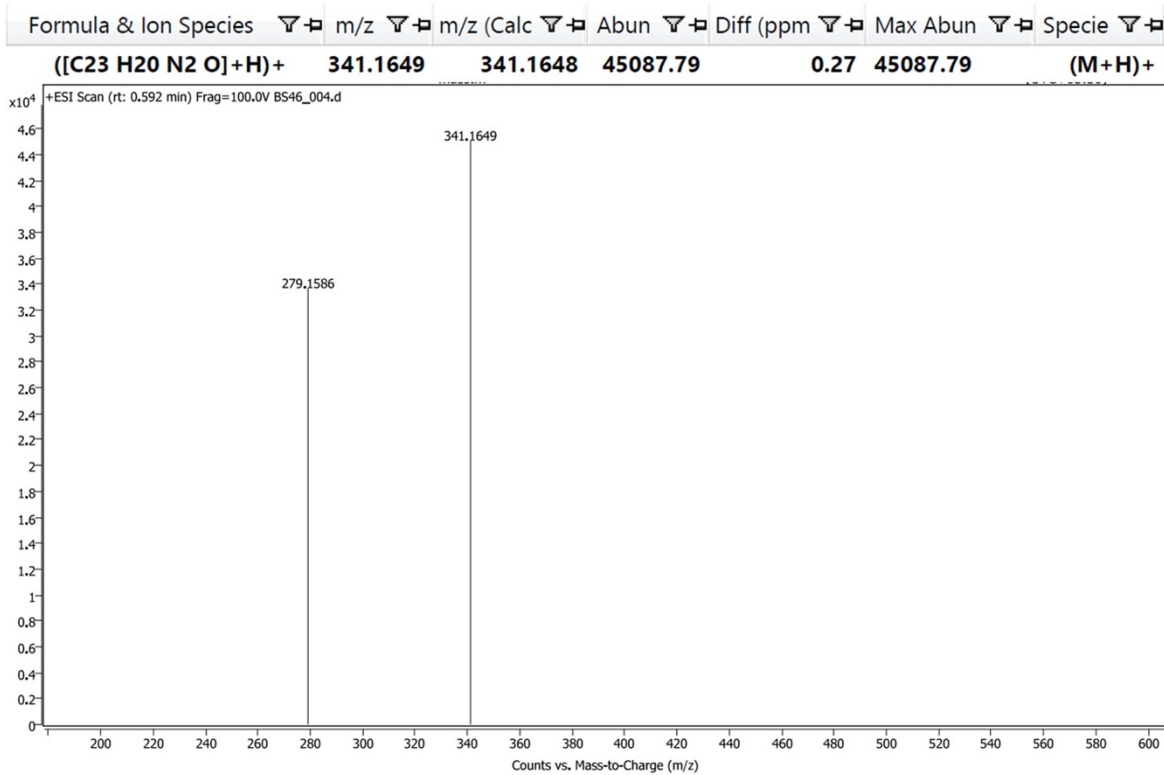

**Figure 10. Spectrum of compound BV-10**

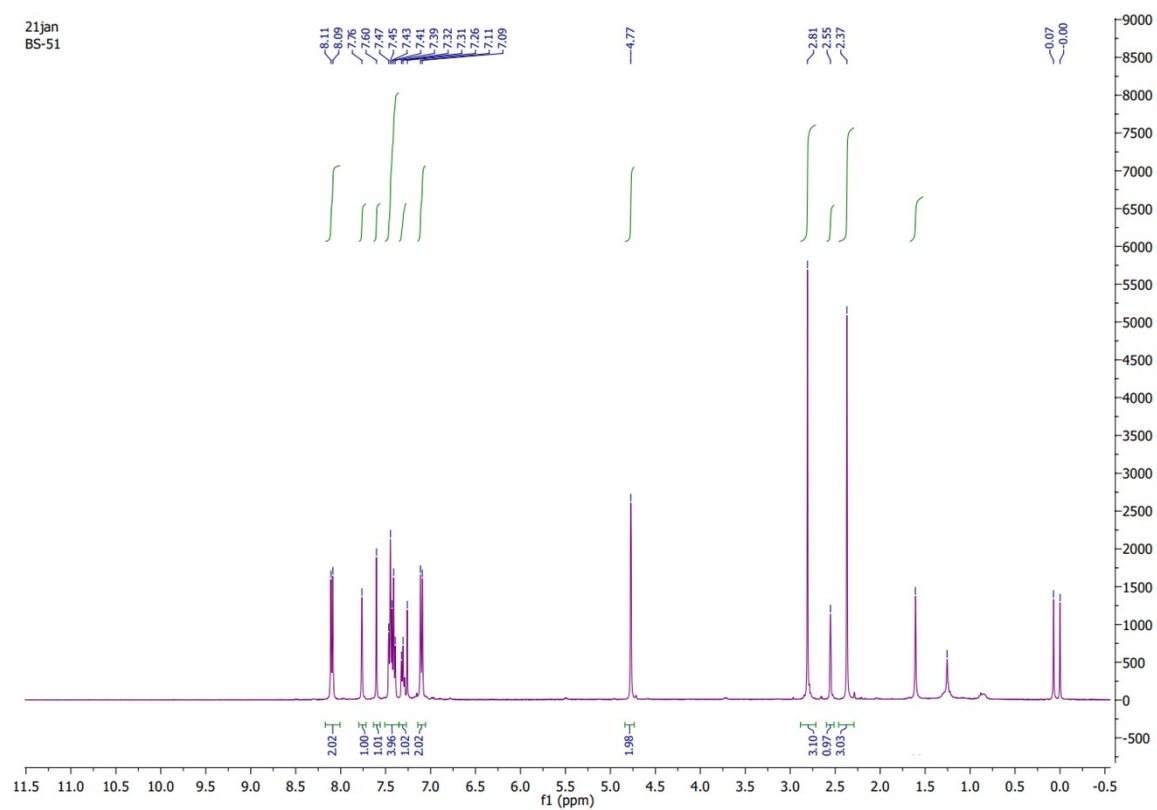

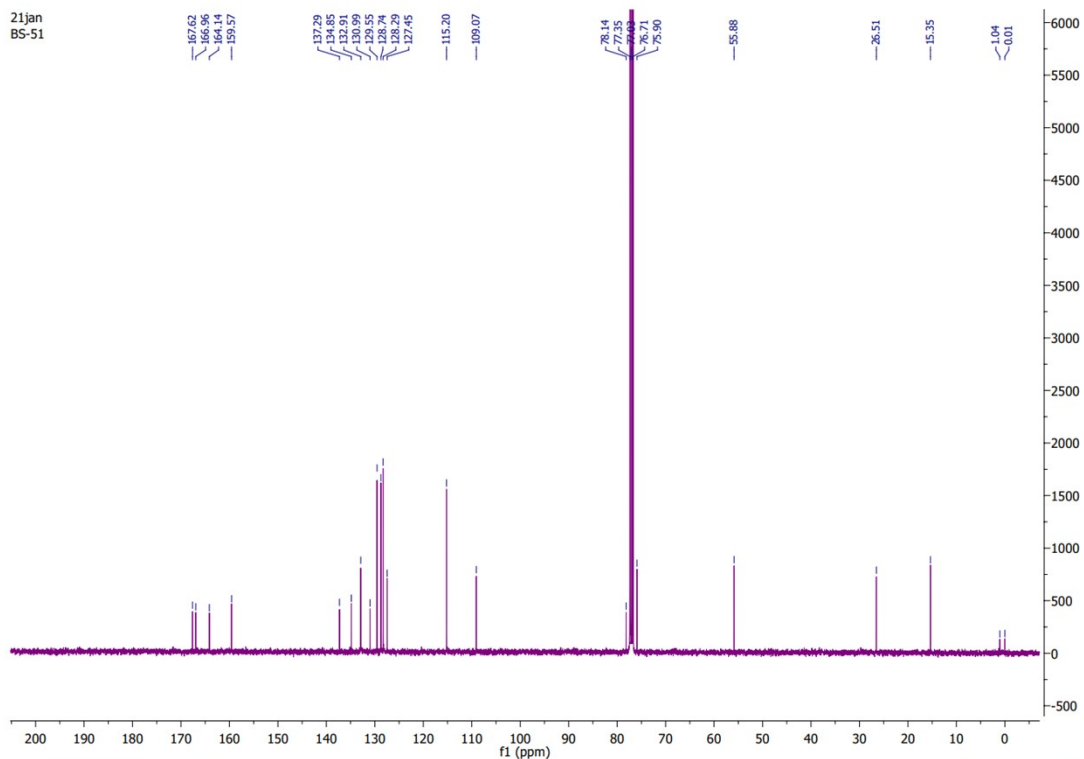

| Formula & Ion Species                 | m/z             | m/z (Calc)      | Abun            | Diff (ppm)  | Max Abun         | Specie                   |
|---------------------------------------|-----------------|-----------------|-----------------|-------------|------------------|--------------------------|
| <b>[(C23 H20 N2 O)+H]<sup>+</sup></b> | <b>341.1652</b> | <b>341.1648</b> | <b>339662.2</b> | <b>1.06</b> | <b>339662.25</b> | <b>(M+H)<sup>+</sup></b> |

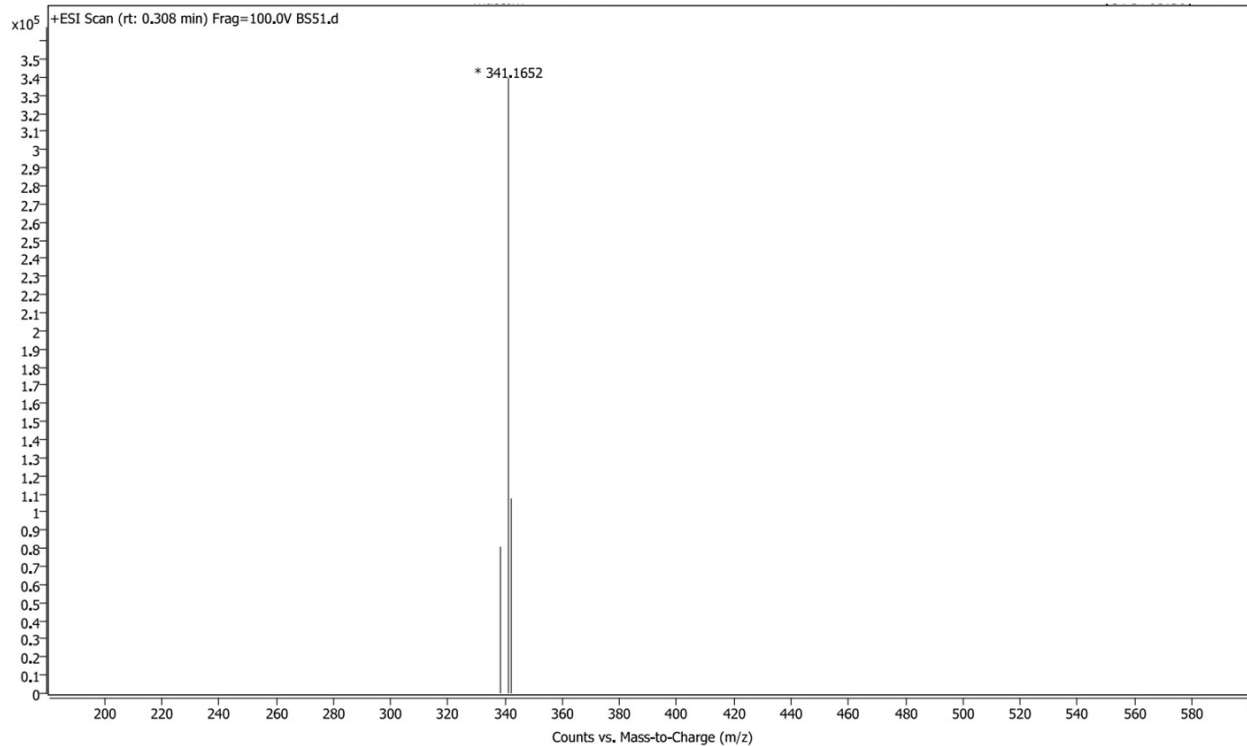

**Figure 11. Spectrum of compound BV-11**

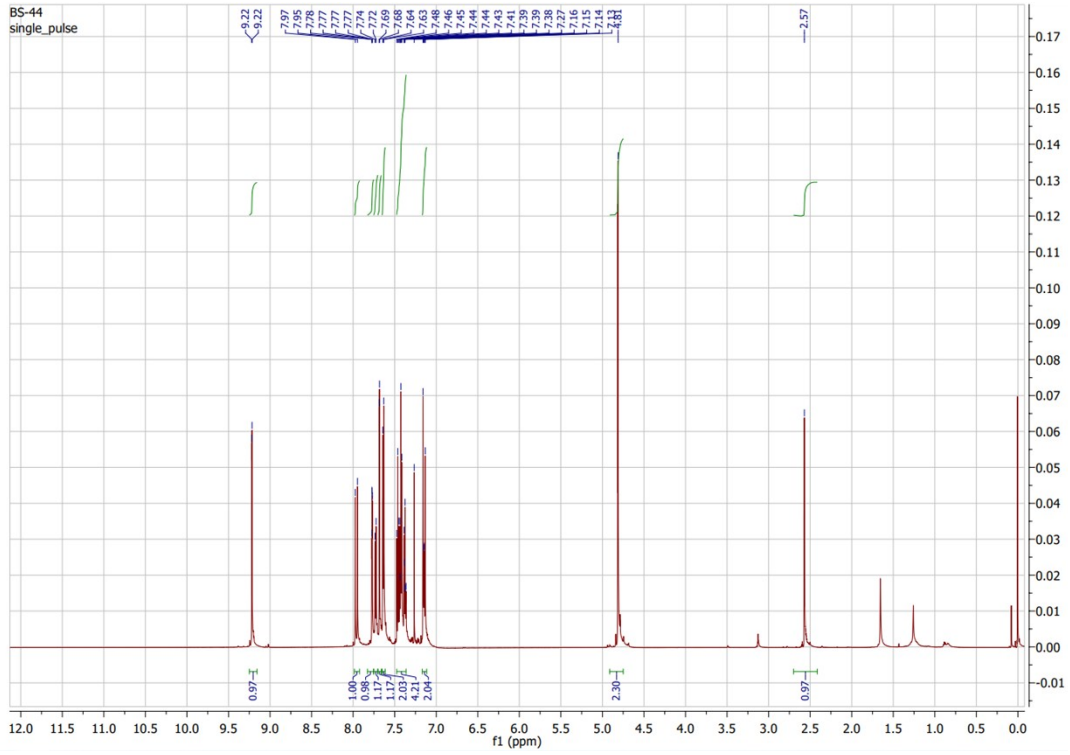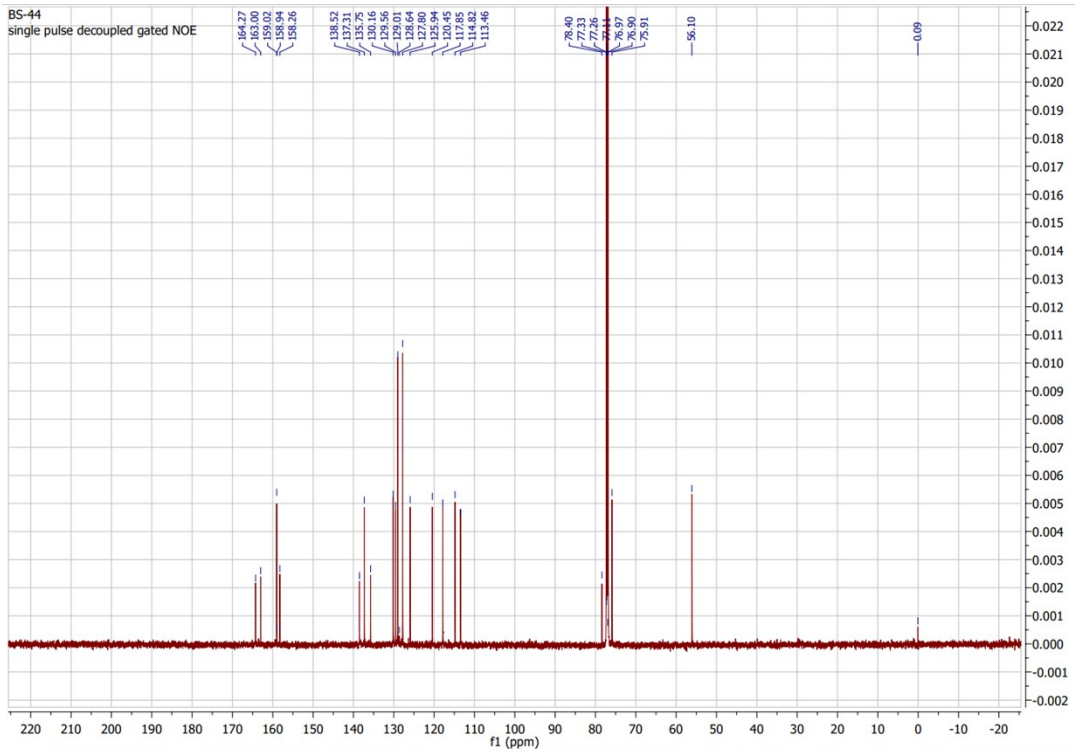

Formula & Ion Species  $\nabla$   $\square$  m/z  $\nabla$   $\square$  m/z (Calc  $\nabla$   $\square$  Abun  $\nabla$   $\square$  Diff (ppm  $\nabla$   $\square$  Max Abun  $\nabla$   $\square$  Specie /  $\nabla$   $\square$

**[(C<sub>21</sub>H<sub>16</sub>N<sub>2</sub>O)]<sup>+</sup>H<sup>+</sup>    313.1336    313.1335    135488.05    0.17    135488.05    (M+H)<sup>+</sup>**

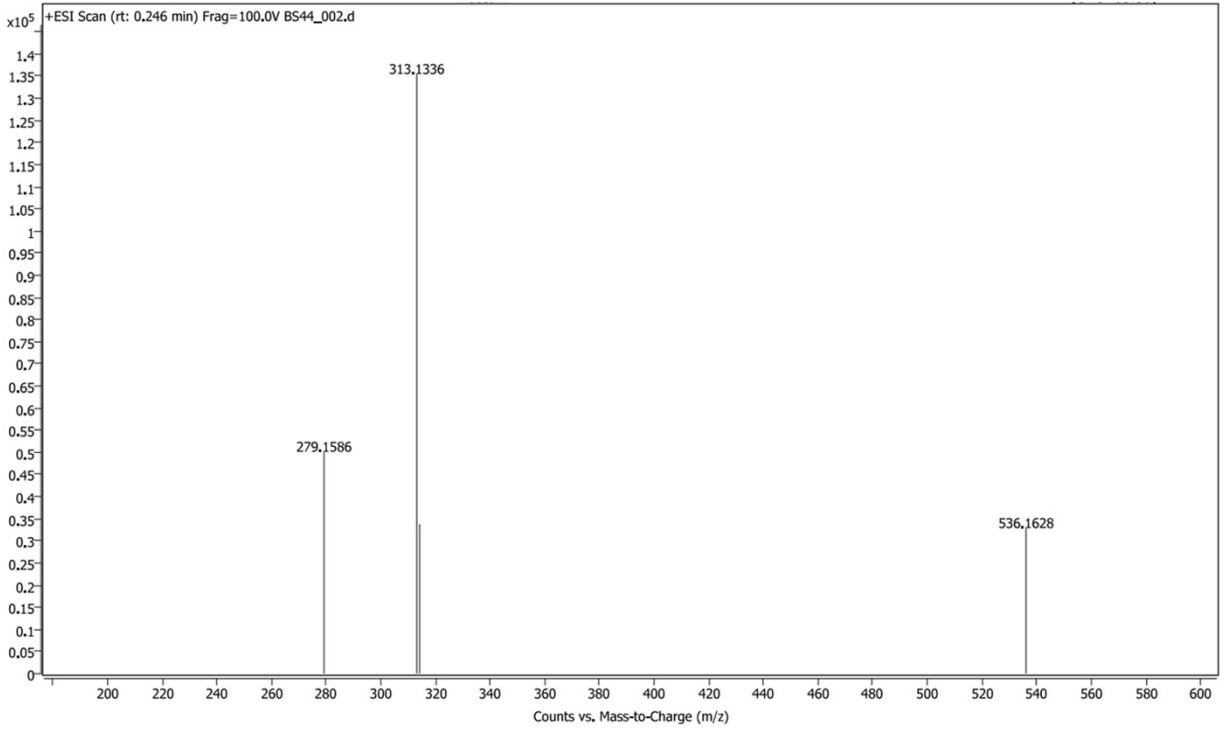

Figure 12. Spectrum of compound BV-12

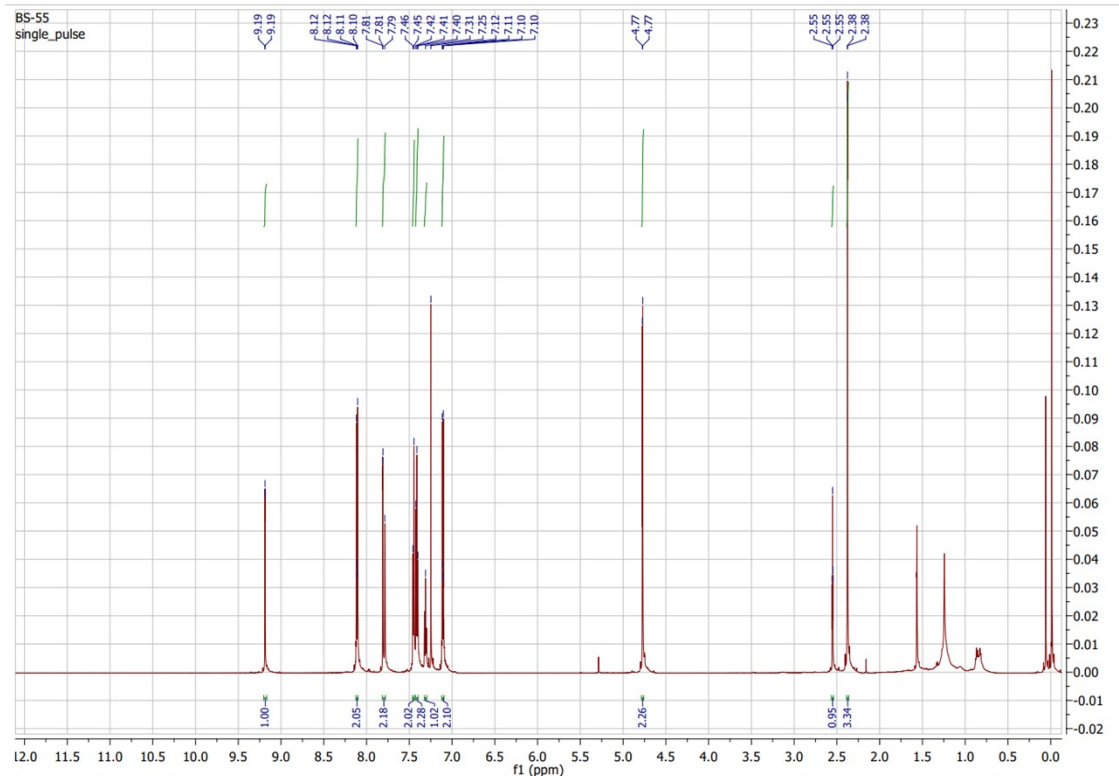

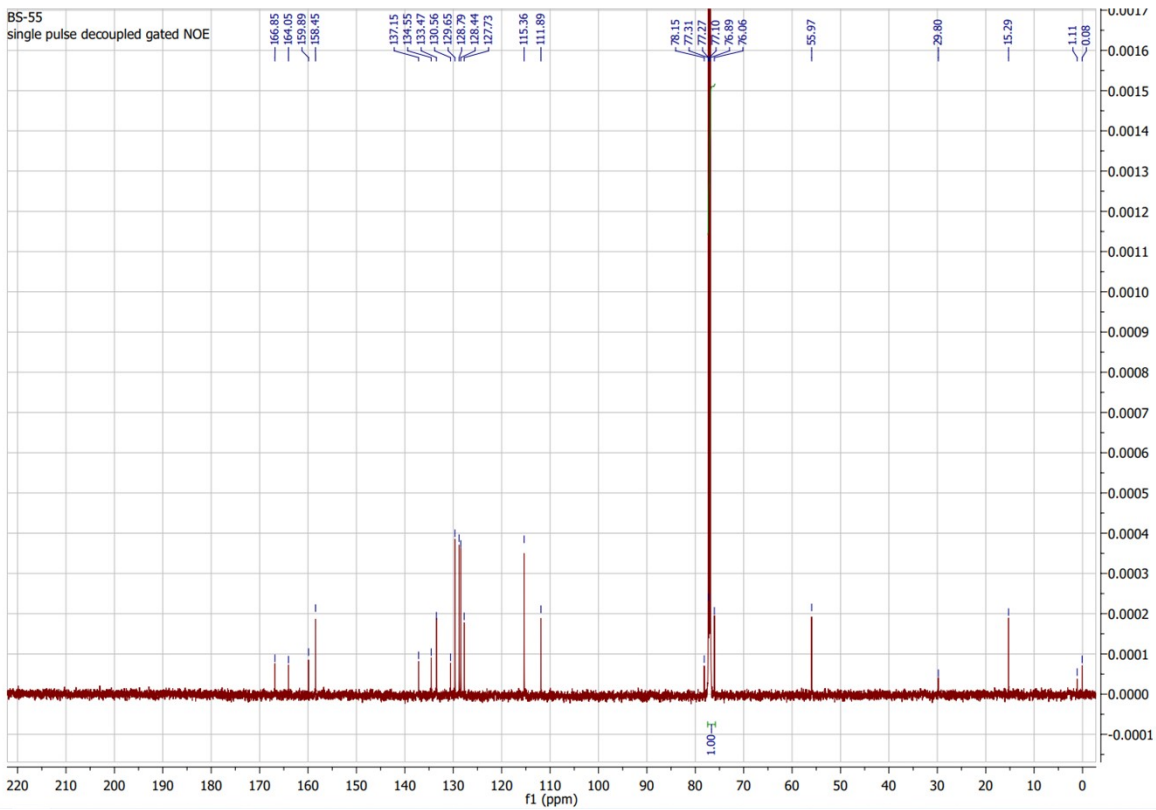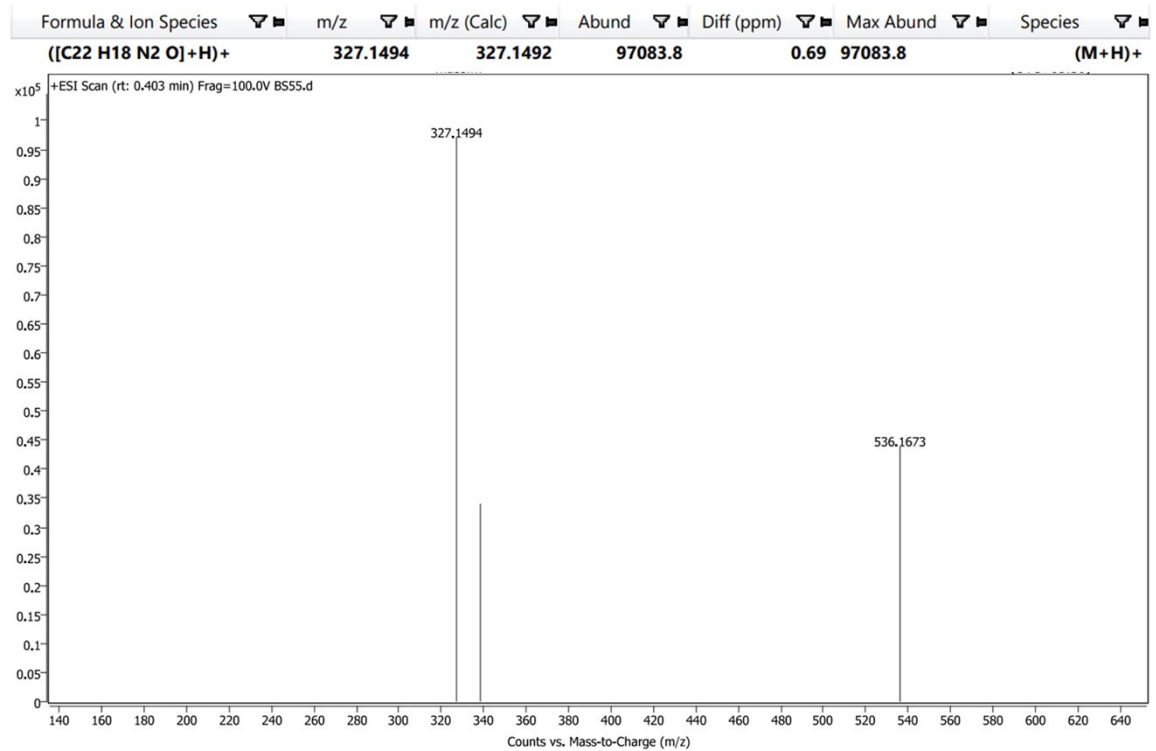

Figure 13. Spectrum of compound BV-13

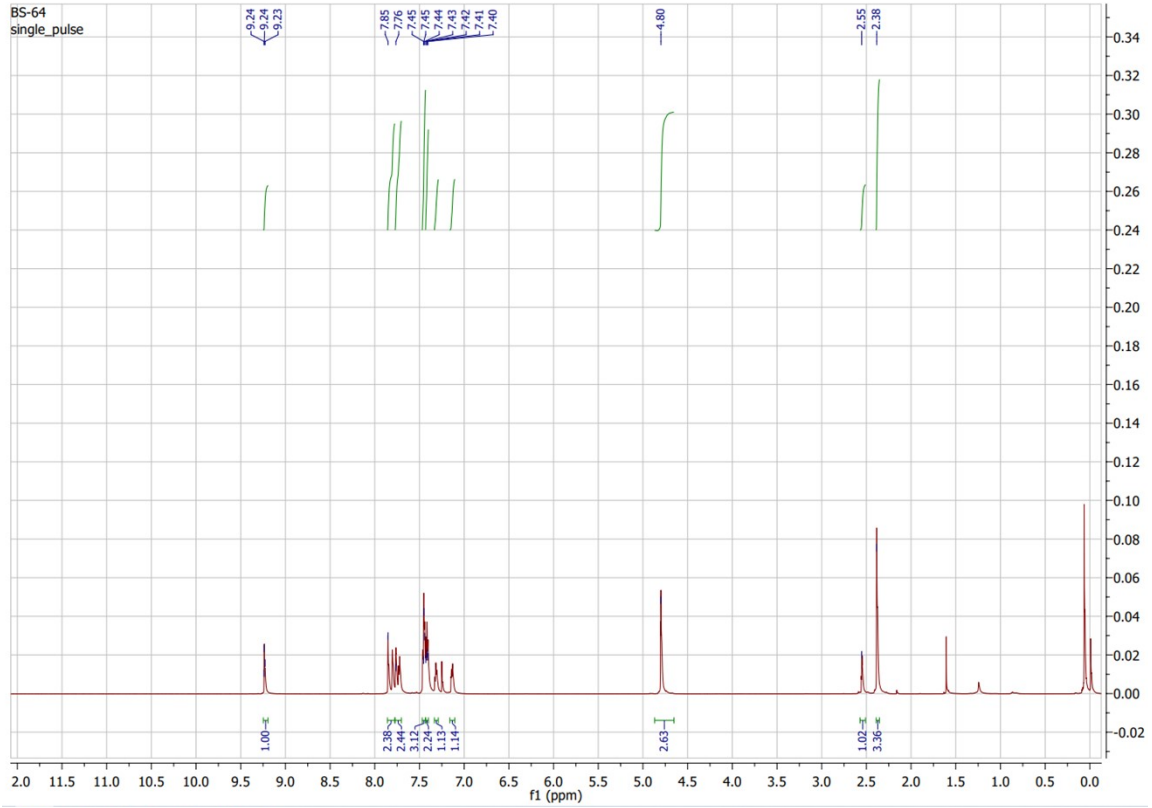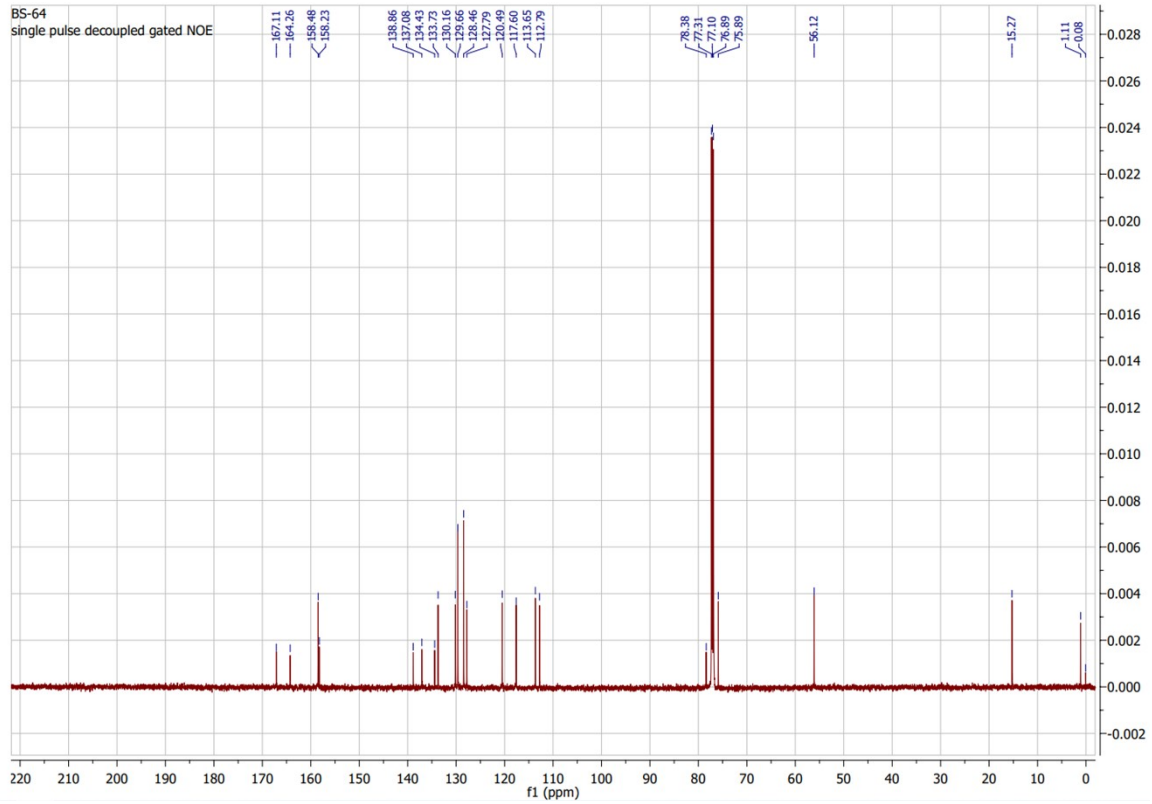

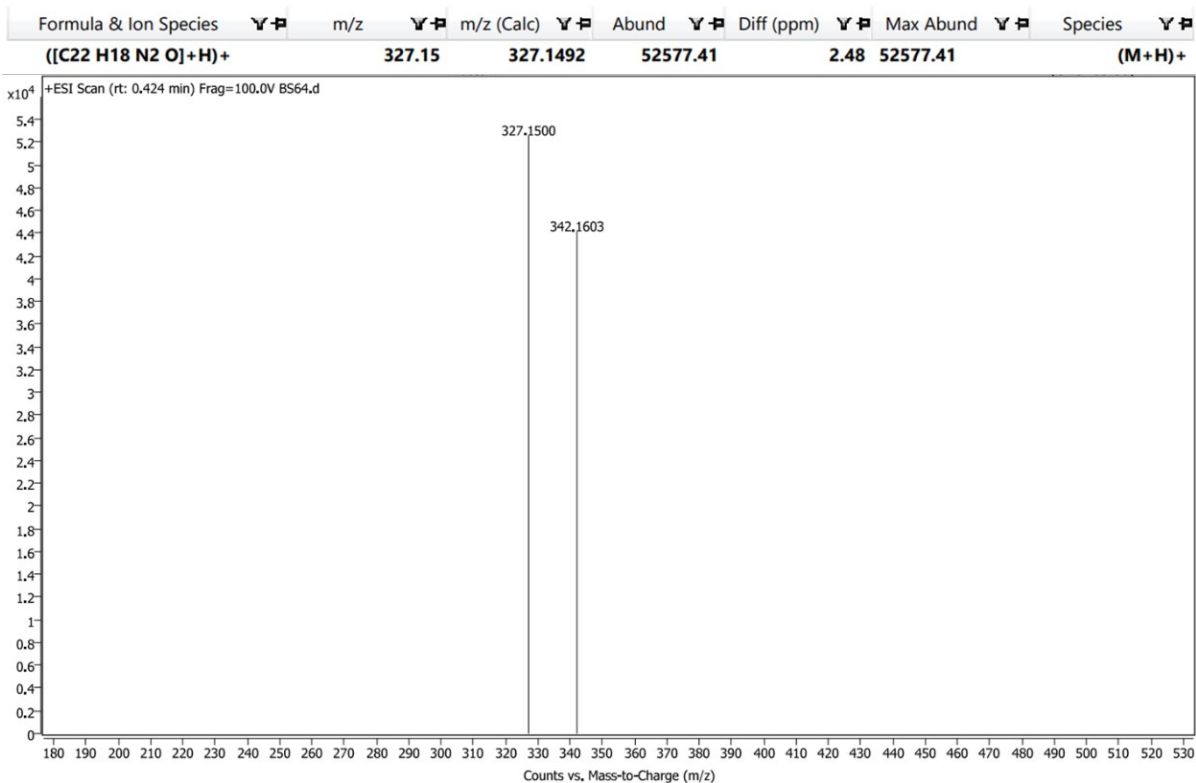

**Figure 14. Spectrum of compound BV-14**

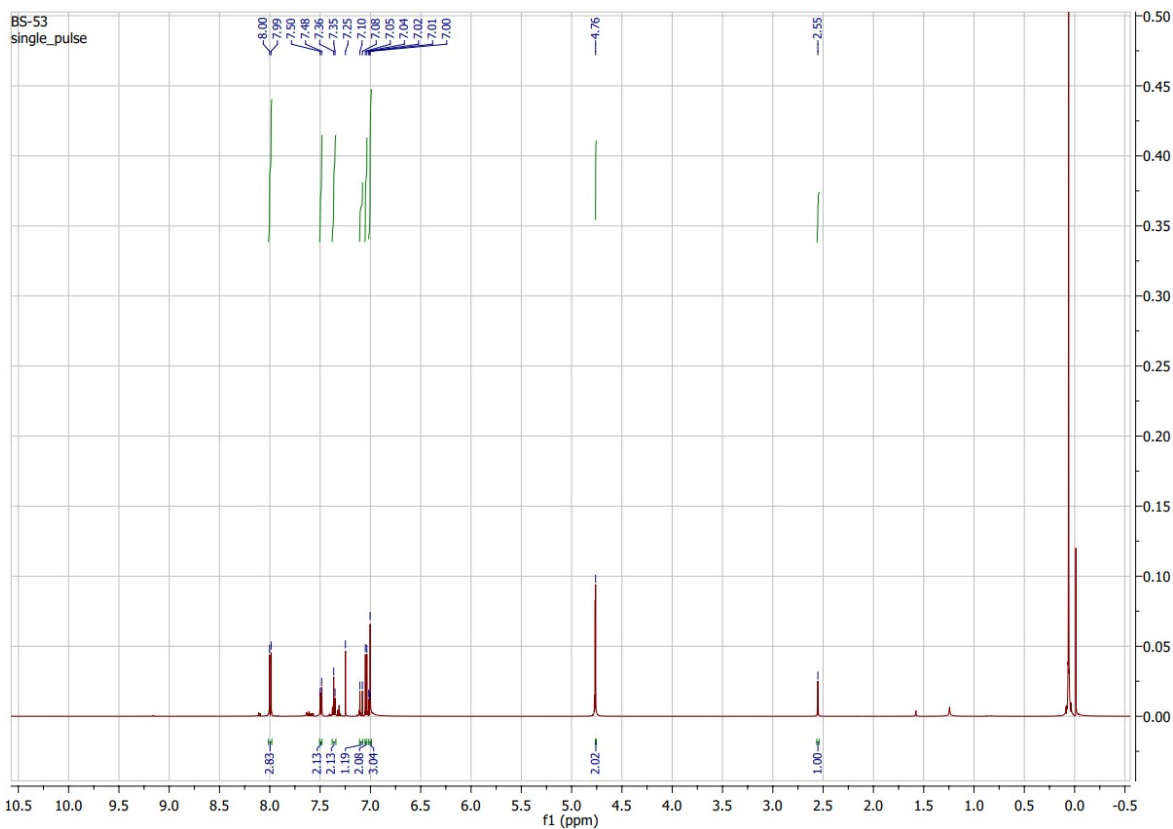



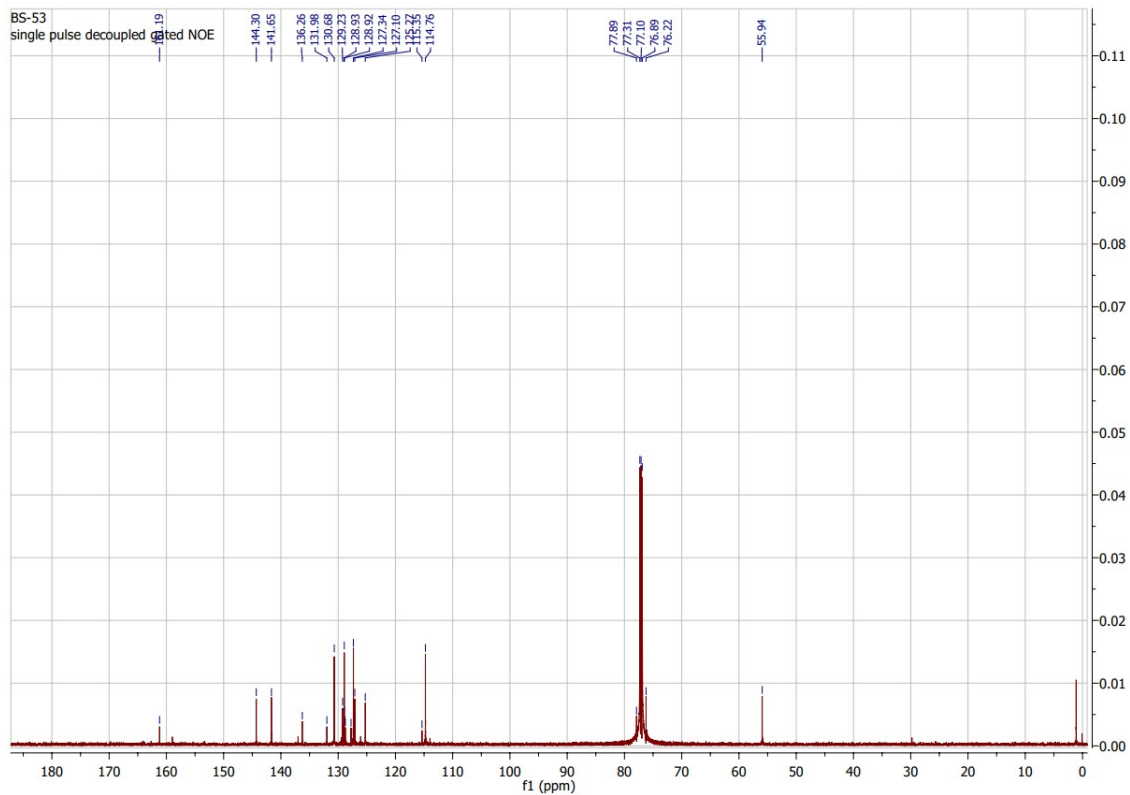

Formula & Ion Species  $\nabla$   $m/z$   $\nabla$   $m/z$  (Calc)  $\nabla$  Abun  $\nabla$  Diff (ppm)  $\nabla$  Max Abun  $\nabla$  Specie  $\nabla$

**[(C<sub>21</sub>H<sub>16</sub>N<sub>2</sub>O)<sub>2</sub>H]<sup>+</sup> 313.1336 313.1335 135488.05 0.17 135488.05 (M+H)<sup>+</sup>**

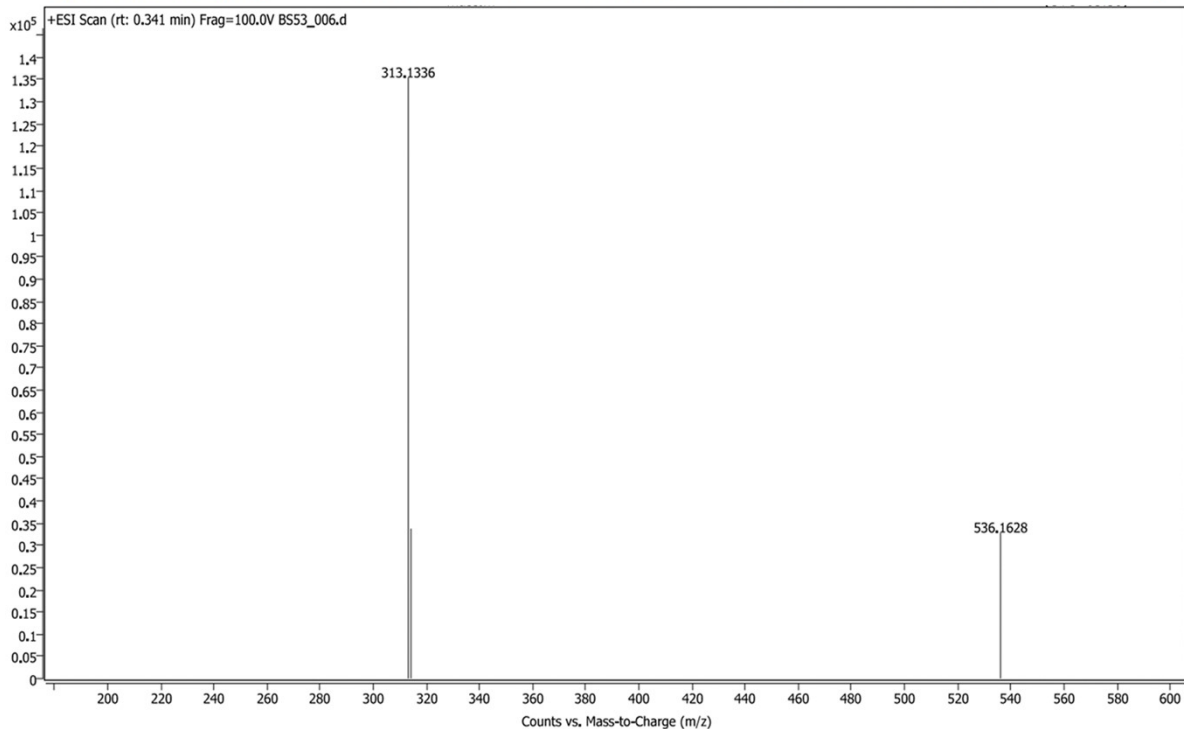

**Figure 15. Spectrum of compound BV-15**
